# Supplementary material for: Thousands of previously unknown phages discovered in whole-community human gut metagenomes
Source: Microbiome. 2021 Mar 29;9:78. doi: 10.1186/s40168-021-01017-w (PMC8008677; doi:10.1186/s40168-021-01017-w)
Supplement: Supplementary file 2 — Additional file 1. Clustering information for 3,378 gut phages identified in the study. Phage genomes were dereplicated at 95% identity over 80% of the contig length. The GenBank accession codes for each phage and the representative sequence is provided in columns 1 and 3, respectively. [file 40168_2021_1017_MOESM2_ESM.csv]

contig	cluster	representative	cluster_size
OBVG01001876.1	1_1	OBVG01001876.1	1
OBYS01001660.1	1_2	OBYS01001660.1	1
OAWC01001873.1	1_3	OAWC01001873.1	1
OAXJ01003676.1	1_4	OAXJ01003676.1	1
OLRW01004789.1	2_0	OLRW01004789.1	1
OIYG01005942.1	3_0	OIYG01005942.1	1
OLHG01004617.1	4_0	OLHG01004617.1	1
OWHX01002690.1	5_1	OWHX01002690.1	2
OWIC01001390.1	5_1	OWHX01002690.1	2
OGXR01006103.1	5_2	OGXR01006103.1	1
OIEE01001859.1	6_0	OIEE01001859.1	1
OAVB01003773.1	7_0	OAVB01003773.1	1
OHUS01000947.1	8_1	OHUS01000947.1	4
OHXA01001033.1	8_1	OHUS01000947.1	4
OHZZ01000768.1	8_1	OHUS01000947.1	4
OIAM01000923.1	8_1	OHUS01000947.1	4
OLPR01006968.1	9_0	OLPR01006968.1	1
OJMM01004950.1	10_0	OJMM01004950.1	1
OJQH01002518.1	11_0	OJQH01002518.1	1
OWJP01001588.1	12_0	OWJP01001588.1	1
OGXG01004035.1	13_1	OKRW01006434.1	2
OKRW01006434.1	13_1	OKRW01006434.1	2
OOIF01005611.1	13_2	OOIF01005611.1	1
OHAQ01007306.1	14_0	OHAQ01007306.1	1
OLPC01006059.1	15_0	OLPC01006059.1	1
OHBJ01008694.1	16_1	OHBJ01008694.1	1
OOBZ01006138.1	16_2	OOBZ01006138.1	1
OGYL01006862.1	16_3	OGYL01006862.1	1
OOBB01002102.1	16_4	OOBB01002102.1	1
OHJS01003197.1	17_1	OHJS01003197.1	2
OHTZ01003126.1	17_1	OHJS01003197.1	2
OLPT01004650.1	18_0	OLPT01004650.1	1
OJOA01003183.1	19_0	OJOA01003183.1	1
OLSI01004133.1	20_0	OLSI01004133.1	1
OLNP01007284.1	21_0	OLNP01007284.1	1
PPYE01074010.1	22_0	PPYE01074010.1	1
OGXT01006824.1	23_0	OGXT01006824.1	1
OLGN01003851.1	24_0	OLGN01003851.1	1
OIGP01000346.1	25_1	OIVK01000295.1	12
OIIJ01000294.1	25_1	OIVK01000295.1	12
OIQT01000303.1	25_1	OIVK01000295.1	12
OIQV01000317.1	25_1	OIVK01000295.1	12
OIRM01000256.1	25_1	OIVK01000295.1	12
OIUE01000284.1	25_1	OIVK01000295.1	12
OIVJ01000263.1	25_1	OIVK01000295.1	12
OIVK01000295.1	25_1	OIVK01000295.1	12
OKXF01000308.1	25_1	OIVK01000295.1	12
OKZF01000312.1	25_1	OIVK01000295.1	12
OKZU01000313.1	25_1	OIVK01000295.1	12
OLEZ01000335.1	25_1	OIVK01000295.1	12
OCHH01002666.1	25_2	OCHH01002666.1	1
OBIB01001702.1	26_1	OWJF01002644.1	3
OWJF01002644.1	26_1	OWJF01002644.1	3
OWJS01002104.1	26_1	OWJF01002644.1	3
OKSC01007475.1	28_1	OKSC01007475.1	1
PPYF01131876.1	28_2	PPYF01131876.1	1
OHBJ01008884.1	29_1	OHBJ01008884.1	1
OOCX01004989.1	29_2	OOCX01004989.1	1
OIZO01003587.1	30_0	OIZO01003587.1	1
OLRU01006320.1	31_0	OLRU01006320.1	1
OFLZ01004412.1	32_1	OFLZ01004412.1	1
OLVR01006309.1	32_2	OLVR01006309.1	1
OJNK01003572.1	32_3	OJNK01003572.1	1
OIGT01000457.1	33_1	OIGT01000457.1	17
OIHL01000432.1	33_1	OIGT01000457.1	17
OIIE01000658.1	33_1	OIGT01000457.1	17
OISV01000495.1	33_1	OIGT01000457.1	17
OITL01000475.1	33_1	OIGT01000457.1	17
OITW01000523.1	33_1	OIGT01000457.1	17
OIUV01000751.1	33_1	OIGT01000457.1	17
OKYH01000499.1	33_1	OIGT01000457.1	17
OKYU01000475.1	33_1	OIGT01000457.1	17
OKZW01000788.1	33_1	OIGT01000457.1	17
OLEP01000754.1	33_1	OIGT01000457.1	17
OLEQ01000640.1	33_1	OIGT01000457.1	17
OLER01000744.1	33_1	OIGT01000457.1	17
OLEV01000782.1	33_1	OIGT01000457.1	17
OLFC01000615.1	33_1	OIGT01000457.1	17
OLFL01000455.1	33_1	OIGT01000457.1	17
OLKF01000808.1	33_1	OIGT01000457.1	17
OLRG01006909.1	33_2	OLRG01006909.1	1
OBIN01000108.1	33_3	OBIN01000108.1	3
OBJY01000135.1	33_3	OBIN01000108.1	3
OBKB01000208.1	33_3	OBIN01000108.1	3
OIXR01004823.1	33_4	OIXR01004823.1	1
OLNO01006497.1	33_5	OLNO01006497.1	1
OFPS01004795.1	34_1	OFPS01004795.1	1
OHJG01001947.1	34_2	OHJG01001947.1	1
OBIN01000113.1	35_1	OBIN01000113.1	3
OBJW01000147.1	35_1	OBIN01000113.1	3
OBKD01000431.1	35_1	OBIN01000113.1	3
OKSH01006445.1	36_0	OKSH01006445.1	1
OOAF01004476.1	37_0	OOAF01004476.1	1
OJRQ01001482.1	38_1	OKSB01008616.1	2
OKSB01008616.1	38_1	OKSB01008616.1	2
OGCQ01010280.1	38_2	OGCQ01010280.1	5
OGWT01007322.1	38_2	OGCQ01010280.1	5
OGXK01006098.1	38_2	OGCQ01010280.1	5
OGYM01006737.1	38_2	OGCQ01010280.1	5
OWIX01003778.1	38_2	OGCQ01010280.1	5
OBIN01000115.1	39_1	OBIN01000115.1	6
OBJJ01000437.1	39_1	OBIN01000115.1	6
OBJW01000152.1	39_1	OBIN01000115.1	6
OBJY01000147.1	39_1	OBIN01000115.1	6
OBKB01000217.1	39_1	OBIN01000115.1	6
OBKD01000439.1	39_1	OBIN01000115.1	6
OGQX01007759.1	40_0	OGQX01007759.1	1
OLOA01010186.1	41_0	OLOA01010186.1	1
OIEM01005011.1	42_0	OIEM01005011.1	1
OQVR01004309.1	43_1	OQVR01004309.1	2
OQWM01010381.1	43_1	OQVR01004309.1	2
OLOU01005163.1	44_0	OLOU01005163.1	1
OBJJ01000411.1	45_1	OBJJ01000411.1	3
OBJW01000140.1	45_1	OBJJ01000411.1	3
OBKD01000414.1	45_1	OBJJ01000411.1	3
OBJP01002255.1	46_0	OBJP01002255.1	1
PPYE01502888.1	47_0	PPYE01502888.1	1
OOIF01006106.1	48_0	OOIF01006106.1	1
QWCK01012665.1	49_0	QWCK01012665.1	1
OIWT01008784.1	50_1	OIWT01008784.1	3
OIWU01009168.1	50_1	OIWT01008784.1	3
OLGE01008838.1	50_1	OIWT01008784.1	3
OLZI01003975.1	51_1	OLZI01003975.1	3
OMCG01004257.1	51_1	OLZI01003975.1	3
OMDL01003681.1	51_1	OLZI01003975.1	3
OFMC01005703.1	51_2	OFMC01005703.1	1
OLOE01003603.1	52_0	OLOE01003603.1	1
OGQL01006604.1	53_1	OGQL01006604.1	2
OGXI01007892.1	53_1	OGQL01006604.1	2
OGWW01004302.1	54_1	OOCA01002941.1	2
OOCA01002941.1	54_1	OOCA01002941.1	2
OLXX01001573.1	55_1	OLXX01001573.1	3
OLZO01002072.1	55_1	OLXX01001573.1	3
OMDY01001843.1	55_1	OLXX01001573.1	3
OGYQ01003376.1	56_0	OGYQ01003376.1	1
OGRA01009040.1	57_1	OGRA01009040.1	1
OMGG01002072.1	57_2	OMGG01002072.1	1
OKVK01004220.1	58_1	OKVK01004220.1	1
OWJI01005373.1	58_2	OWJI01005373.1	1
OLSF01007721.1	58_3	OLSF01007721.1	1
OLWZ01003814.1	58_4	OLWZ01003814.1	2
OLXN01004690.1	58_4	OLWZ01003814.1	2
QWCY01013226.1	58_5	QWCY01013226.1	1
OCHC01005081.1	58_6	OCHC01005081.1	4
OCPS01006255.1	58_6	OCHC01005081.1	4
OCPU01006218.1	58_6	OCHC01005081.1	4
OCQT01001138.1	58_6	OCHC01005081.1	4
OGZD01005376.1	58_7	OODU01008847.1	2
OODU01008847.1	58_7	OODU01008847.1	2
OGXU01004194.1	58_8	OGXU01004194.1	1
OHAX01002933.1	58_9	OHAX01002933.1	1
OGQO01008382.1	58_10	OGQO01008382.1	1
OGYO01007477.1	58_11	OGYO01007477.1	1
OHMN01004088.1	58_12	OHMN01004088.1	1
OHBK01001507.1	58_13	OHBK01001507.1	4
OHNL01001421.1	58_13	OHBK01001507.1	4
OHSW01001308.1	58_13	OHBK01001507.1	4
OHUC01001104.1	58_13	OHBK01001507.1	4
OBIM01002066.1	58_14	OBIM01002066.1	1
OJME01006204.1	58_15	OJME01006204.1	1
QWBY01007825.1	58_16	QWBY01007825.1	1
OHJO01002664.1	58_17	OHJO01002664.1	4
OHLE01002657.1	58_17	OHJO01002664.1	4
OHPK01002863.1	58_17	OHJO01002664.1	4
OHTC01002788.1	58_17	OHJO01002664.1	4
OLGH01007689.1	58_18	OLGH01007689.1	1
OLRD01003498.1	58_19	OLRD01003498.1	1
OBKW01000519.1	58_20	OBKW01000519.1	1
OHJY01002921.1	58_21	OHJY01002921.1	1
OIZG01004330.1	59_0	OIZG01004330.1	1
OHGH01002414.1	60_1	OHGH01002414.1	2
OHQL01002350.1	60_1	OHGH01002414.1	2
OLQA01008679.1	61_1	OLQA01008679.1	1
OOAT01002148.1	61_2	OOAT01002148.1	1
OCPQ01003499.1	62_0	OCPQ01003499.1	1
OOCL01005179.1	63_0	OOCL01005179.1	1
OGXC01006339.1	64_0	OGXC01006339.1	1
OGYB01003419.1	65_0	OGYB01003419.1	1
OGQU01006553.1	66_1	OGQU01006553.1	1
OLQL01006475.1	66_2	OLQL01006475.1	1
OLFT01007842.1	66_3	OLFT01007842.1	1
OOAW01002826.1	67_0	OOAW01002826.1	1
OOCG01003160.1	68_0	OOCG01003160.1	1
OLYY01001943.1	69_1	OMBL01002014.1	3
OLZV01001992.1	69_1	OMBL01002014.1	3
OMBL01002014.1	69_1	OMBL01002014.1	3
OJMM01003700.1	70_1	OJMM01003700.1	2
OJMO01003943.1	70_1	OJMM01003700.1	2
OIXL01002241.1	70_2	OIXL01002241.1	1
OLFV01004605.1	71_0	OLFV01004605.1	1
OGXZ01003819.1	72_1	OGXZ01003819.1	1
OODA01001588.1	72_2	OODA01001588.1	1
OGYL01005951.1	73_0	OGYL01005951.1	1
OOCH01004433.1	74_0	OOCH01004433.1	1
CYGL01001059.1	75_0	CYGL01001059.1	1
OGYY01005403.1	76_0	OGYY01005403.1	1
OGXC01004920.1	77_1	OGXC01004920.1	1
OLNT01003493.1	77_2	OLNT01003493.1	1
OGYX01005257.1	78_1	OGYX01005257.1	1
OOBW01002294.1	78_2	OOBW01002294.1	1
OLNH01002375.1	79_1	OLNH01002375.1	1
OLRM01001502.1	79_2	OLRM01001502.1	1
ONZY01003738.1	79_3	ONZY01003738.1	1
OODH01003444.1	79_4	OODH01003444.1	1
OHAB01003145.1	79_5	OHAB01003145.1	1
OKSV01002405.1	79_6	OKSV01002405.1	1
OJPG01002972.1	80_0	OJPG01002972.1	1
OLNW01007600.1	81_0	OLNW01007600.1	1
OGXK01005203.1	82_0	OGXK01005203.1	1
OGYK01006258.1	83_0	OGYK01006258.1	1
OGZI01006501.1	84_0	OGZI01006501.1	1
OHAN01005183.1	85_0	OHAN01005183.1	1
OQVI01005821.1	86_0	OQVI01005821.1	1
OJRA01001820.1	87_1	OJRA01001820.1	1
OJRO01003643.1	87_2	OJRO01003643.1	1
QWCK01010672.1	88_0	QWCK01010672.1	1
OOBN01004807.1	89_0	OOBN01004807.1	1
OOIG01006111.1	90_0	OOIG01006111.1	1
OIXL01002645.1	91_0	OIXL01002645.1	1
OLQD01006594.1	92_0	OLQD01006594.1	1
OBIN01000097.1	93_1	OBIN01000097.1	6
OBJJ01000391.1	93_1	OBIN01000097.1	6
OBJW01000131.1	93_1	OBIN01000097.1	6
OBJY01000113.1	93_1	OBIN01000097.1	6
OBKB01000200.1	93_1	OBIN01000097.1	6
OBKD01000392.1	93_1	OBIN01000097.1	6
OLOK01005525.1	94_0	OLOK01005525.1	1
OOBY01001752.1	95_1	OOBY01001752.1	1
OOCH01004839.1	95_2	OOCH01004839.1	1
OLQJ01001793.1	96_0	OLQJ01001793.1	1
OOBX01001071.1	97_0	OOBX01001071.1	1
OBHU01002802.1	98_0	OBHU01002802.1	1
OBIN01000089.1	99_1	OBIN01000089.1	2
OBJY01000101.1	99_1	OBIN01000089.1	2
OBKB01000191.1	99_2	OBKB01000191.1	1
OJOZ01000949.1	99_3	OJOZ01000949.1	1
ONZU01002833.1	99_4	ONZU01002833.1	1
OODG01004958.1	100_0	OODG01004958.1	1
OOAM01003643.1	101_1	OOAM01003643.1	1
OOAY01001516.1	101_2	OOAY01001516.1	1
OODU01007314.1	102_0	OODU01007314.1	1
CYGL01001296.1	103_0	CYGL01001296.1	1
OHAD01005715.1	104_0	OHAD01005715.1	1
OIBK01001974.1	105_0	OIBK01001974.1	1
OGYH01005632.1	106_1	OGYH01005632.1	1
OODH01003854.1	106_2	OODH01003854.1	1
OLNJ01002829.1	107_0	OLNJ01002829.1	1
OOBM01003116.1	108_0	OOBM01003116.1	1
ONZT01003140.1	109_1	ONZT01003140.1	1
OODK01002463.1	109_2	OODK01002463.1	1
OCPS01005097.1	110_1	OCPS01005097.1	1
OCPU01005096.1	110_2	OCPU01005096.1	1
OCHC01004264.1	110_3	OCHC01004264.1	1
OOCS01002066.1	111_0	OOCS01002066.1	1
OAVX01001682.1	112_1	OAVX01001682.1	2
OGRT01003996.1	112_1	OAVX01001682.1	2
OJPO01001990.1	113_1	OJPO01001990.1	1
OJQJ01003165.1	113_2	OJQJ01003165.1	1
OIGA01000791.1	114_1	OIGA01000791.1	3
OIGC01000928.1	114_1	OIGA01000791.1	3
OKXD01000770.1	114_1	OIGA01000791.1	3
OIGH01000901.1	114_2	OIGH01000901.1	1
OIFZ01000786.1	114_3	OIFZ01000786.1	2
OIGL01000791.1	114_3	OIFZ01000786.1	2
OIGB01000840.1	114_4	OIGB01000840.1	4
OIGI01000802.1	114_4	OIGB01000840.1	4
OIGM01000892.1	114_4	OIGB01000840.1	4
OIGN01000784.1	114_4	OIGB01000840.1	4
OIGO01000914.1	114_5	OKXC01000765.1	2
OKXC01000765.1	114_5	OKXC01000765.1	2
OIGK01000766.1	114_6	OIGK01000766.1	1
OJML01004144.1	115_0	OJML01004144.1	1
OIET01002435.1	116_0	OIET01002435.1	1
PPYE01210102.1	117_0	PPYE01210102.1	1
OGZR01001818.1	118_0	OGZR01001818.1	1
OLQV01006279.1	119_0	OLQV01006279.1	1
OJMN01004229.1	120_1	OJMN01004229.1	1
OJNI01004041.1	120_2	OJNI01004041.1	1
OCRA01000848.1	121_0	OCRA01000848.1	1
OGYG01003332.1	122_0	OGYG01003332.1	1
OGYS01003820.1	123_0	OGYS01003820.1	1
OCPS01004741.1	124_1	OCPS01004741.1	2
OCPU01004698.1	124_1	OCPS01004741.1	2
OJRO01003451.1	124_2	OJRO01003451.1	1
OGZC01003850.1	124_3	OGZC01003850.1	1
CYGL01001244.1	125_0	CYGL01001244.1	1
OIXL01002506.1	126_0	OIXL01002506.1	1
OBJJ01000357.1	127_1	OBJJ01000357.1	2
OBJW01000120.1	127_1	OBJJ01000357.1	2
OBIN01000085.1	127_2	OBIN01000085.1	1
OBKD01000361.1	127_3	OBKD01000361.1	1
OBJY01000099.1	127_4	OBJY01000099.1	1
OBKB01000181.1	127_5	OBKB01000181.1	1
OGXC01004998.1	128_1	OGXC01004998.1	1
OGZI01006041.1	128_2	OGZI01006041.1	1
OBZU01000920.1	129_0	OBZU01000920.1	1
OGXU01003504.1	130_0	OGXU01003504.1	1
OGYO01005603.1	131_0	OGYO01005603.1	1
OQVI01006143.1	132_0	OQVI01006143.1	1
OLOG01003598.1	133_0	OLOG01003598.1	1
CYGL01001353.1	134_0	CYGL01001353.1	1
OKSF01005444.1	135_0	OKSF01005444.1	1
OBKF01001169.1	136_0	OBKF01001169.1	1
OGWR01006086.1	137_0	OGWR01006086.1	1
OGZI01006561.1	138_0	OGZI01006561.1	1
QWCY01011343.1	139_0	QWCY01011343.1	1
OBYG01002481.1	140_1	OBYG01002481.1	1
OODH01003899.1	140_2	OODH01003899.1	1
OCLZ01001109.1	141_1	OCLZ01001109.1	1
OGYT01004447.1	141_2	OGYT01004447.1	1
OHAD01005716.1	142_1	OHAD01005716.1	1
OLFU01005796.1	142_2	OLFU01005796.1	1
OGXN01004951.1	142_3	OGXN01004951.1	1
OLQI01003790.1	142_4	OLQI01003790.1	1
OOAF01003960.1	142_5	OOAF01003960.1	1
OBWF01001434.1	143_0	OBWF01001434.1	1
OJPJ01002020.1	144_0	OJPJ01002020.1	1
OLVR01005831.1	145_0	OLVR01005831.1	1
OLQV01006260.1	146_0	OLQV01006260.1	1
OMGY01006516.1	147_0	OMGY01006516.1	1
OWKP01003708.1	148_1	OWKP01003708.1	1
QWCK01009830.1	148_2	QWCK01009830.1	1
OBAA01002073.1	149_0	OBAA01002073.1	1
OGXB01002894.1	150_1	OGXB01002894.1	2
OGYA01004315.1	150_1	OGXB01002894.1	2
OLPR01006057.1	151_0	OLPR01006057.1	1
OGXP01004207.1	152_0	OGXP01004207.1	1
OGRA01006947.1	153_0	OGRA01006947.1	1
OBZW01001601.1	154_0	OBZW01001601.1	1
OIQS01000913.1	155_1	OIQS01000913.1	2
OLED01000893.1	155_1	OIQS01000913.1	2
OKXN01000847.1	155_2	OKXN01000847.1	3
OKXO01000857.1	155_2	OKXN01000847.1	3
OKXR01000831.1	155_2	OKXN01000847.1	3
OGYG01003325.1	155_3	OGYG01003325.1	1
OIUW01000902.1	155_4	OIUW01000902.1	2
OLDI01000962.1	155_4	OIUW01000902.1	2
OIGE01000810.1	155_5	OIGE01000810.1	2
OKZE01000917.1	155_5	OIGE01000810.1	2
OITZ01000900.1	155_6	OITZ01000900.1	3
OIVC01000908.1	155_6	OITZ01000900.1	3
OLFN01000819.1	155_6	OITZ01000900.1	3
OLFT01006166.1	156_0	OLFT01006166.1	1
OLRC01004010.1	157_0	OLRC01004010.1	1
OWIT01002369.1	158_1	OWIT01002369.1	1
QWCN01011762.1	158_2	QWCN01011762.1	1
OGWR01005333.1	159_0	OGWR01005333.1	1
OLIT01005257.1	160_0	OLIT01005257.1	1
OJPE01001868.1	161_1	OJQI01002669.1	2
OJQI01002669.1	161_1	OJQI01002669.1	2
OBKF01001083.1	161_2	OBKF01001083.1	1
OJQP01001120.1	161_3	OJQP01001120.1	1
OCAN01002462.1	161_4	OCAN01002462.1	1
OHRG01002536.1	162_1	OHRG01002536.1	2
OKTF01002477.1	162_1	OHRG01002536.1	2
OHRH01002514.1	162_2	OHRH01002514.1	1
OGCO01010149.1	162_3	OGCO01010149.1	1
OWJB01003276.1	163_0	OWJB01003276.1	1
OHAP01004287.1	164_0	OHAP01004287.1	1
OLOY01001854.1	165_0	OLOY01001854.1	1
OAWO01001555.1	166_0	OAWO01001555.1	1
OJQY01001293.1	167_0	OJQY01001293.1	1
OGYS01003712.1	168_1	OGYS01003712.1	1
OHAN01004971.1	168_2	OHAN01004971.1	1
PVMN01006155.1	169_1	PVMN01006155.1	1
QWCE01010432.1	169_2	QWCE01010432.1	1
OGZH01004617.1	170_0	OGZH01004617.1	1
OIYT01005062.1	171_0	OIYT01005062.1	1
OBBS01000094.1	172_0	OBBS01000094.1	1
OBUR01000128.1	173_0	OBUR01000128.1	1
QWCV01000644.1	174_0	QWCV01000644.1	1
OIFN01000181.1	175_1	OIFN01000181.1	1
OODN01000310.1	175_2	OODN01000310.1	1
OJUJ01000095.1	176_0	OJUJ01000095.1	1
OBJZ01000158.1	177_0	OBJZ01000158.1	1
OCAF01000104.1	178_1	OCAF01000104.1	1
OIFW01000086.1	178_2	OIFW01000086.1	1
CYGL01000107.1	179_0	CYGL01000107.1	1
OAWA01000288.1	180_1	OAWA01000288.1	1
PPYF01602751.1	180_2	PPYF01602751.1	1
PPYE01643544.1	181_0	PPYE01643544.1	1
OKVD01000182.1	182_1	OKVD01000182.1	1
OLGE01000615.1	182_2	OLGE01000615.1	1
OKVZ01000152.1	183_1	OKVZ01000152.1	1
OLJG01000087.1	183_2	OLJG01000087.1	1
OKFE01000068.1	183_3	OKFE01000068.1	1
OAWA01000325.1	184_1	OAWA01000325.1	1
OKHM01000183.1	184_2	OKHM01000183.1	1
OAWM01000322.1	185_0	OAWM01000322.1	1
OKWX01000129.1	186_0	OKWX01000129.1	1
OIFG01000167.1	187_1	OIFG01000167.1	3
OIFK01000232.1	187_1	OIFG01000167.1	3
OKBY01000053.1	187_1	OIFG01000167.1	3
OKWX01000150.1	187_2	OKWX01000150.1	1
OBZE01000209.1	188_1	OBZE01000209.1	1
OIFP01000127.1	188_2	OIFP01000127.1	1
OIFK01000211.1	189_1	OKWK01000250.1	2
OKWK01000250.1	189_1	OKWK01000250.1	2
OIFN01000171.1	189_2	OKIR01000045.1	2
OKIR01000045.1	189_2	OKIR01000045.1	2
OIFJ01000177.1	190_0	OIFJ01000177.1	1
OKGA01000105.1	191_0	OKGA01000105.1	1
PPYF01602783.1	192_0	PPYF01602783.1	1
OLNM01000583.1	193_0	OLNM01000583.1	1
OHAY01000948.1	194_0	OHAY01000948.1	1
OKVH01000316.1	195_0	OKVH01000316.1	1
OHUS01000127.1	196_1	OHUS01000127.1	4
OHXA01000115.1	196_1	OHUS01000127.1	4
OHZZ01000187.1	196_1	OHUS01000127.1	4
OIAM01000153.1	196_1	OHUS01000127.1	4
OGPB01000326.1	197_0	OGPB01000326.1	1
OLOL01000710.1	198_0	OLOL01000710.1	1
OGCQ01001027.1	199_0	OGCQ01001027.1	1
OIXH01001131.1	200_0	OIXH01001131.1	1
OWIX01000280.1	201_1	OWIX01000280.1	1
PPYF01593229.1	201_2	PPYF01593229.1	1
OLFX01000965.1	202_1	PPYF01525089.1	4
OOBM01000330.1	202_1	PPYF01525089.1	4
OOIF01000624.1	202_1	PPYF01525089.1	4
PPYF01525089.1	202_1	PPYF01525089.1	4
OIWL01000893.1	203_0	OIWL01000893.1	1
OIYG01000540.1	213_1	OLHG01000298.1	2
OLHG01000298.1	213_1	OLHG01000298.1	2
OLPB01000197.1	214_0	OLPB01000197.1	1
OQWD01000073.1	215_0	OQWD01000073.1	1
OMGG01000289.1	216_2	OMGG01000289.1	1
OAUY01000129.1	217_1	OAUY01000129.1	3
OGYY01000339.1	217_1	OAUY01000129.1	3
QWCV01000445.1	217_1	OAUY01000129.1	3
PPYF01653838.1	218_0	PPYF01653838.1	1
OQVO01000029.1	219_0	OQVO01000029.1	1
OOCD01000209.1	222_1	OOCD01000209.1	1
QRFC01000346.1	222_2	QRFC01000346.1	1
OHAH01000213.1	222_3	OHAH01000213.1	1
OGQR01000270.1	223_0	OGQR01000270.1	1
OHZC01000055.1	226_0	OHZC01000055.1	1
OCKB01000084.1	230_0	OCKB01000084.1	1
OKHN01000141.1	232_0	OKHN01000141.1	1
OLWY01000021.1	241_1	OLWY01000021.1	2
OLXJ01000020.1	241_1	OLWY01000021.1	2
OHPB01000098.1	245_0	OHPB01000098.1	1
OIYR01000124.1	246_0	OIYR01000124.1	1
OGRU01000494.1	247_1	OGRU01000494.1	1
OLWH01000140.1	247_2	OLWH01000140.1	1
PPYE01740195.1	248_0	PPYE01740195.1	1
OLOP01000183.1	249_1	OLOP01000183.1	2
OLRO01000238.1	249_1	OLOP01000183.1	2
OLGA01000199.1	249_2	OLGA01000199.1	1
OLGL01000461.1	249_3	OLGL01000461.1	1
OLOA01000311.1	249_4	OLOA01000311.1	1
OLJB01000137.1	249_5	OLJB01000137.1	1
OIYG01000504.1	250_0	OIYG01000504.1	1
OKSA01004061.1	252_8	OKSA01004061.1	1
OATU01000433.1	258_1	OLFT01000780.1	2
OLFT01000780.1	258_1	OLFT01000780.1	2
OBRN01000041.1	259_0	OBRN01000041.1	1
OBRN01000043.1	260_0	OBRN01000043.1	1
OLXK01000509.1	261_0	OLXK01000509.1	1
PPYF01241765.1	262_0	PPYF01241765.1	1
OGOZ01000078.1	263_0	OGOZ01000078.1	1
PPYE01030041.1	264_0	PPYE01030041.1	1
OGOC01000451.1	265_1	OGOC01000451.1	1
OKVF01000563.1	265_2	OKVF01000563.1	1
OAZZ01000299.1	265_3	OAZZ01000299.1	1
OBXA01000324.1	266_0	OBXA01000324.1	1
OHYE01000095.1	267_1	OHYE01000095.1	5
OHYF01000081.1	267_1	OHYE01000095.1	5
OHZK01000084.1	267_1	OHYE01000095.1	5
OIAL01000090.1	267_1	OHYE01000095.1	5
OLPU01000131.1	267_1	OHYE01000095.1	5
OIWM01000184.1	268_0	OIWM01000184.1	1
OIWT01000076.1	269_0	OIWT01000076.1	1
OBIN01000005.1	271_1	OBIN01000005.1	1
OBVB01000239.1	271_2	OBVB01000239.1	1
OAWP01000296.1	272_1	OAWP01000296.1	1
OHAG01000253.1	272_2	OHAG01000253.1	1
OGQU01000330.1	273_0	OGQU01000330.1	1
OBKS01000180.1	274_1	OBKV01000156.1	2
OBKV01000156.1	274_1	OBKV01000156.1	2
OGZK01000124.1	275_0	OGZK01000124.1	1
OLQV01000168.1	276_0	OLQV01000168.1	1
OHQS01000375.1	277_1	OHQS01000375.1	2
OLXP01000299.1	277_1	OHQS01000375.1	2
OHAY01000753.1	277_2	OHAY01000753.1	1
OKVK01000387.1	277_3	OKVK01000387.1	1
OMAL01000413.1	277_4	OMEV01000432.1	2
OMEV01000432.1	277_4	OMEV01000432.1	2
OIWQ01001172.1	277_5	OIWQ01001172.1	2
OLPS01001069.1	277_5	OIWQ01001172.1	2
OBHU01000533.1	277_6	OBHU01000533.1	1
OLOA01000391.1	278_0	OLOA01000391.1	1
OIZI01000089.1	279_0	OIZI01000089.1	1
OLFY01000087.1	280_1	OLFY01000087.1	2
QRFC01000035.1	280_1	OLFY01000087.1	2
OLYC01000040.1	281_0	OLYC01000040.1	1
OMGI01000189.1	283_1	OMGI01000189.1	3
OMGS01000200.1	283_1	OMGI01000189.1	3
OMGV01000176.1	283_1	OMGI01000189.1	3
OCLY01000238.1	284_1	OCLY01000238.1	13
OJRV01000504.1	284_1	OCLY01000238.1	13
OJRW01000287.1	284_1	OCLY01000238.1	13
OJRX01000489.1	284_1	OCLY01000238.1	13
OJRY01000309.1	284_1	OCLY01000238.1	13
OJRZ01000328.1	284_1	OCLY01000238.1	13
OJSA01000365.1	284_1	OCLY01000238.1	13
OJSB01000319.1	284_1	OCLY01000238.1	13
OJSD01000550.1	284_1	OCLY01000238.1	13
OJSE01000645.1	284_1	OCLY01000238.1	13
OJSF01000347.1	284_1	OCLY01000238.1	13
OJSL01000333.1	284_1	OCLY01000238.1	13
OLKG01000287.1	284_1	OCLY01000238.1	13
OGSS01000409.1	284_2	OGSS01000409.1	1
OIRQ01000015.1	285_1	OIRQ01000015.1	3
OITA01000012.1	285_1	OIRQ01000015.1	3
OIUO01000022.1	285_1	OIRQ01000015.1	3
OGOX01000194.1	286_0	OGOX01000194.1	1
OATJ01000262.1	287_1	OATJ01000262.1	3
OBIA01000235.1	287_1	OATJ01000262.1	3
OOAD01000254.1	287_1	OATJ01000262.1	3
OGOZ01000183.1	287_2	OGOZ01000183.1	1
OQVH01000257.1	287_3	OQVH01000257.1	1
OKRW01000365.1	288_1	OKRW01000365.1	1
OLZF01000400.1	288_2	OLZF01000400.1	1
OBKF01000177.1	289_1	OBKF01000177.1	2
OGRI01000455.1	289_1	OBKF01000177.1	2
OHSJ01000095.1	289_2	OHSJ01000095.1	1
OFRZ01000393.1	290_1	OLRB01000285.1	2
OLRB01000285.1	290_1	OLRB01000285.1	2
OIWL01000702.1	290_2	OLFU01000527.1	3
OLFU01000527.1	290_2	OLFU01000527.1	3
OLGI01000455.1	290_2	OLFU01000527.1	3
OGYH01000455.1	290_3	OGYH01000455.1	1
OJMH01000638.1	291_0	OJMH01000638.1	1
OAWF01000066.1	292_0	OAWF01000066.1	1
OOAI01000021.1	293_0	OOAI01000021.1	1
OJNX01000030.1	294_1	OJNX01000030.1	3
OJON01000027.1	294_1	OJNX01000030.1	3
OMGY01000128.1	294_1	OJNX01000030.1	3
OGUN01000078.1	295_0	OGUN01000078.1	1
OJPD01000050.1	297_1	OJPW01000080.1	2
OJPW01000080.1	297_1	OJPW01000080.1	2
OLYA01000029.1	298_1	OLYA01000029.1	2
OMBX01000017.1	298_1	OLYA01000029.1	2
OLZO01000059.1	298_2	OLZO01000059.1	1
OIGD01000128.1	299_0	OIGD01000128.1	1
OMEK01000015.1	300_0	OMEK01000015.1	1
OCLH01000002.1	301_1	OCLH01000002.1	3
OCLL01000009.1	301_1	OCLH01000002.1	3
OCQZ01000005.1	301_1	OCLH01000002.1	3
OIYR01000132.1	302_0	OIYR01000132.1	1
OLHG01000205.1	303_0	OLHG01000205.1	1
OLHG01000216.1	304_0	OLHG01000216.1	1
OBAQ01000124.1	305_1	OLGH01000138.1	30
OBJF01000128.1	305_1	OLGH01000138.1	30
OGCO01000246.1	305_1	OLGH01000138.1	30
OGPZ01000072.1	305_1	OLGH01000138.1	30
OHJU01000019.1	305_1	OLGH01000138.1	30
OHJX01000034.1	305_1	OLGH01000138.1	30
OHKK01000062.1	305_1	OLGH01000138.1	30
OHKU01000021.1	305_1	OLGH01000138.1	30
OHPO01000018.1	305_1	OLGH01000138.1	30
OHTD01000013.1	305_1	OLGH01000138.1	30
OICK01000023.1	305_1	OLGH01000138.1	30
OICR01000026.1	305_1	OLGH01000138.1	30
OIWP01000200.1	305_1	OLGH01000138.1	30
OIWV01000065.1	305_1	OLGH01000138.1	30
OJNS01000048.1	305_1	OLGH01000138.1	30
OJPR01000012.1	305_1	OLGH01000138.1	30
OJQP01000090.1	305_1	OLGH01000138.1	30
OJRC01000065.1	305_1	OLGH01000138.1	30
OJRK01000037.1	305_1	OLGH01000138.1	30
OJRT01000053.1	305_1	OLGH01000138.1	30
OKSB01000084.1	305_1	OLGH01000138.1	30
OLFY01000217.1	305_1	OLGH01000138.1	30
OLFZ01000118.1	305_1	OLGH01000138.1	30
OLGB01000200.1	305_1	OLGH01000138.1	30
OLGH01000138.1	305_1	OLGH01000138.1	30
OLNN01000114.1	305_1	OLGH01000138.1	30
OLPR01000090.1	305_1	OLGH01000138.1	30
OLRU01000124.1	305_1	OLGH01000138.1	30
OMDD01000022.1	305_1	OLGH01000138.1	30
QRFC01000100.1	305_1	OLGH01000138.1	30
OGQC01000025.1	306_1	OJML01000036.1	9
OIAG01000032.1	306_1	OJML01000036.1	9
OJML01000036.1	306_1	OJML01000036.1	9
OJPF01000053.1	306_1	OJML01000036.1	9
OLOA01000141.1	306_1	OJML01000036.1	9
OLXS01000048.1	306_1	OJML01000036.1	9
OLXT01000055.1	306_1	OJML01000036.1	9
PPYF01544398.1	306_1	OJML01000036.1	9
QRFC01000131.1	306_1	OJML01000036.1	9
OGTB01000094.1	307_1	OLQD01000095.1	4
OIZB01000122.1	307_1	OLQD01000095.1	4
OLPR01000121.1	307_1	OLQD01000095.1	4
OLQD01000095.1	307_1	OLQD01000095.1	4
OGOH01000052.1	307_2	OGOH01000052.1	1
OGOX01000070.1	308_1	OGOX01000070.1	4
OLNM01000123.1	308_1	OGOX01000070.1	4
OLPS01000224.1	308_1	OGOX01000070.1	4
OLQV01000134.1	308_1	OGOX01000070.1	4
OHCC01000110.1	308_2	OHGT01000106.1	4
OHCS01000044.1	308_2	OHGT01000106.1	4
OHGT01000106.1	308_2	OHGT01000106.1	4
OHQG01000049.1	308_2	OHGT01000106.1	4
OATA01000221.1	308_3	OGPH01000157.1	28
OAWV01000101.1	308_3	OGPH01000157.1	28
OBAE01000138.1	308_3	OGPH01000157.1	28
OBAM01000169.1	308_3	OGPH01000157.1	28
OFMC01000149.1	308_3	OGPH01000157.1	28
OGDN01000536.1	308_3	OGPH01000157.1	28
OGPH01000157.1	308_3	OGPH01000157.1	28
OGPO01000092.1	308_3	OGPH01000157.1	28
OGPV01000062.1	308_3	OGPH01000157.1	28
OGQC01000021.1	308_3	OGPH01000157.1	28
OGXX01000119.1	308_3	OGPH01000157.1	28
OHVK01000045.1	308_3	OGPH01000157.1	28
OHXX01000028.1	308_3	OGPH01000157.1	28
OHYQ01000025.1	308_3	OGPH01000157.1	28
OIAE01000030.1	308_3	OGPH01000157.1	28
OIAX01000031.1	308_3	OGPH01000157.1	28
OJMH01000252.1	308_3	OGPH01000157.1	28
OKUX01000027.1	308_3	OGPH01000157.1	28
OKUZ01000038.1	308_3	OGPH01000157.1	28
OLRX01000114.1	308_3	OGPH01000157.1	28
OMAD01000033.1	308_3	OGPH01000157.1	28
OMAM01000068.1	308_3	OGPH01000157.1	28
OMAN01000076.1	308_3	OGPH01000157.1	28
OMAO01000060.1	308_3	OGPH01000157.1	28
OMBQ01000204.1	308_3	OGPH01000157.1	28
OMFK01000075.1	308_3	OGPH01000157.1	28
OMGS01000102.1	308_3	OGPH01000157.1	28
QWCY01001518.1	308_3	OGPH01000157.1	28
OHEF01000085.1	309_1	OJNJ01000010.1	7
OHGQ01000076.1	309_1	OJNJ01000010.1	7
OHRF01000070.1	309_1	OJNJ01000010.1	7
OHSH01000076.1	309_1	OJNJ01000010.1	7
OHVX01000024.1	309_1	OJNJ01000010.1	7
OJNJ01000010.1	309_1	OJNJ01000010.1	7
OJNL01000059.1	309_1	OJNJ01000010.1	7
OCHD01000268.1	310_1	OCQA01000273.1	2
OCQA01000273.1	310_1	OCQA01000273.1	2
OBAO01000228.1	310_2	OBAO01000228.1	1
OGYZ01000077.1	310_3	OGYZ01000077.1	1
OAVK01000059.1	311_1	OBZD01000120.1	69
OAVS01000086.1	311_1	OBZD01000120.1	69
OAWF01000087.1	311_1	OBZD01000120.1	69
OBDK01000001.1	311_1	OBZD01000120.1	69
OBVY01000186.1	311_1	OBZD01000120.1	69
OBZD01000120.1	311_1	OBZD01000120.1	69
OCPM01000070.1	311_1	OBZD01000120.1	69
OFMP01000061.1	311_1	OBZD01000120.1	69
OGCO01000303.1	311_1	OBZD01000120.1	69
OGOH01000035.1	311_1	OBZD01000120.1	69
OGOY01000146.1	311_1	OBZD01000120.1	69
OGQC01000016.1	311_1	OBZD01000120.1	69
OGQI01000058.1	311_1	OBZD01000120.1	69
OGQT01000091.1	311_1	OBZD01000120.1	69
OGQX01000139.1	311_1	OBZD01000120.1	69
OGZI01000212.1	311_1	OBZD01000120.1	69
OGZK01000066.1	311_1	OBZD01000120.1	69
OHAF01000093.1	311_1	OBZD01000120.1	69
OHAQ01000018.1	311_1	OBZD01000120.1	69
OHDD01000030.1	311_1	OBZD01000120.1	69
OHDG01000068.1	311_1	OBZD01000120.1	69
OHEB01000041.1	311_1	OBZD01000120.1	69
OHGL01000062.1	311_1	OBZD01000120.1	69
OHNL01000041.1	311_1	OBZD01000120.1	69
OHQP01000031.1	311_1	OBZD01000120.1	69
OHSW01000033.1	311_1	OBZD01000120.1	69
OHUS01000020.1	311_1	OBZD01000120.1	69
OHVG01000001.1	311_1	OBZD01000120.1	69
OHYA01000050.1	311_1	OBZD01000120.1	69
OHYF01000052.1	311_1	OBZD01000120.1	69
OHYS01000046.1	311_1	OBZD01000120.1	69
OHZZ01000025.1	311_1	OBZD01000120.1	69
OIAM01000033.1	311_1	OBZD01000120.1	69
OIAO01000001.1	311_1	OBZD01000120.1	69
OIDM01000022.1	311_1	OBZD01000120.1	69
OIEB01000023.1	311_1	OBZD01000120.1	69
OIEE01000027.1	311_1	OBZD01000120.1	69
OIJB01000015.1	311_1	OBZD01000120.1	69
OILA01000006.1	311_1	OBZD01000120.1	69
OILS01000010.1	311_1	OBZD01000120.1	69
OINY01000007.1	311_1	OBZD01000120.1	69
OIPM01000006.1	311_1	OBZD01000120.1	69
OIUA01000017.1	311_1	OBZD01000120.1	69
OJAG01000060.1	311_1	OBZD01000120.1	69
OJOY01000069.1	311_1	OBZD01000120.1	69
OJPK01000091.1	311_1	OBZD01000120.1	69
OJPU01000073.1	311_1	OBZD01000120.1	69
OJPY01000051.1	311_1	OBZD01000120.1	69
OJQC01000028.1	311_1	OBZD01000120.1	69
OJQD01000073.1	311_1	OBZD01000120.1	69
OJQI01000028.1	311_1	OBZD01000120.1	69
OJQK01000052.1	311_1	OBZD01000120.1	69
OJQM01000031.1	311_1	OBZD01000120.1	69
OJQR01000116.1	311_1	OBZD01000120.1	69
OJRP01000072.1	311_1	OBZD01000120.1	69
OKTE01000068.1	311_1	OBZD01000120.1	69
OKYP01000015.1	311_1	OBZD01000120.1	69
OLDF01000008.1	311_1	OBZD01000120.1	69
OLOI01000104.1	311_1	OBZD01000120.1	69
OLPR01000103.1	311_1	OBZD01000120.1	69
OLQM01000087.1	311_1	OBZD01000120.1	69
OLUE01000001.1	311_1	OBZD01000120.1	69
OLUL01000001.1	311_1	OBZD01000120.1	69
OLZH01000026.1	311_1	OBZD01000120.1	69
OMGO01000113.1	311_1	OBZD01000120.1	69
OOAG01000105.1	311_1	OBZD01000120.1	69
OOAN01000057.1	311_1	OBZD01000120.1	69
OOBI01000141.1	311_1	OBZD01000120.1	69
QWCY01002752.1	311_1	OBZD01000120.1	69
OIYT01000160.1	312_1	OIYT01000160.1	2
OLVR01000230.1	312_1	OIYT01000160.1	2
OBAO01000194.1	312_2	OHUU01000016.1	28
OBAS01000150.1	312_2	OHUU01000016.1	28
OBZI01000097.1	312_2	OHUU01000016.1	28
OCHD01000164.1	312_2	OHUU01000016.1	28
OFMV01000080.1	312_2	OHUU01000016.1	28
OGUM01000061.1	312_2	OHUU01000016.1	28
OHFL01000062.1	312_2	OHUU01000016.1	28
OHUU01000016.1	312_2	OHUU01000016.1	28
OHZF01000019.1	312_2	OHUU01000016.1	28
OIAA01000022.1	312_2	OHUU01000016.1	28
OIAH01000021.1	312_2	OHUU01000016.1	28
OIZE01000106.1	312_2	OHUU01000016.1	28
OJAG01000054.1	312_2	OHUU01000016.1	28
OJOF01000058.1	312_2	OHUU01000016.1	28
OJOL01000029.1	312_2	OHUU01000016.1	28
OJPW01000117.1	312_2	OHUU01000016.1	28
OJQF01000028.1	312_2	OHUU01000016.1	28
OKSC01000144.1	312_2	OHUU01000016.1	28
OLNQ01000130.1	312_2	OHUU01000016.1	28
OLOJ01000115.1	312_2	OHUU01000016.1	28
OLPP01000131.1	312_2	OHUU01000016.1	28
OLRR01000067.1	312_2	OHUU01000016.1	28
OMCQ01000053.1	312_2	OHUU01000016.1	28
OMEW01000054.1	312_2	OHUU01000016.1	28
OMFN01000064.1	312_2	OHUU01000016.1	28
OMGM01000052.1	312_2	OHUU01000016.1	28
OOAM01000123.1	312_2	OHUU01000016.1	28
QZLR01000025.1	312_2	OHUU01000016.1	28
OBYR01000133.1	313_1	OLVZ01000110.1	6
OGPE01000056.1	313_1	OLVZ01000110.1	6
OHLB01000073.1	313_1	OLVZ01000110.1	6
OHQO01000073.1	313_1	OLVZ01000110.1	6
OHRS01000070.1	313_1	OLVZ01000110.1	6
OLVZ01000110.1	313_1	OLVZ01000110.1	6
OGPA01000136.1	313_2	OGPA01000136.1	4
OHEE01000078.1	313_2	OGPA01000136.1	4
OHHK01000087.1	313_2	OGPA01000136.1	4
OHNZ01000080.1	313_2	OGPA01000136.1	4
OGRM01000071.1	314_1	OLSP01000049.1	3
OLPI01000070.1	314_1	OLSP01000049.1	3
OLSP01000049.1	314_1	OLSP01000049.1	3
OHEC01000055.1	315_1	OHEC01000055.1	2
OHHQ01000050.1	315_1	OHEC01000055.1	2
OHAR01000002.1	316_1	OHAR01000002.1	7
OHGN01000005.1	316_1	OHAR01000002.1	7
OHKC01000008.1	316_1	OHAR01000002.1	7
OHQO01000074.1	316_1	OHAR01000002.1	7
OMCC01000028.1	316_1	OHAR01000002.1	7
OMCD01000044.1	316_1	OHAR01000002.1	7
OMFD01000024.1	316_1	OHAR01000002.1	7
OLPZ01000064.1	316_2	QWCH01000406.1	3
OLQV01000112.1	316_2	QWCH01000406.1	3
QWCH01000406.1	316_2	QWCH01000406.1	3
OHEP01000046.1	316_3	OHPB01000052.1	2
OHPB01000052.1	316_3	OHPB01000052.1	2
OBWV01000146.1	316_4	OCLY01000128.1	4
OCLY01000128.1	316_4	OCLY01000128.1	4
OGOR01000082.1	316_4	OCLY01000128.1	4
OJSG01000134.1	316_4	OCLY01000128.1	4
OBJQ01000109.1	316_5	OFLZ01000081.1	2
OFLZ01000081.1	316_5	OFLZ01000081.1	2
OCLZ01000005.1	316_6	OCLZ01000005.1	3
OMFP01000029.1	316_6	OCLZ01000005.1	3
OMGA01000023.1	316_6	OCLZ01000005.1	3
OATA01000191.1	316_7	OLOC01000071.1	52
OATB01000112.1	316_7	OLOC01000071.1	52
OAVM01000083.1	316_7	OLOC01000071.1	52
OBJF01000143.1	316_7	OLOC01000071.1	52
OBKR01000161.1	316_7	OLOC01000071.1	52
OCSH01000167.1	316_7	OLOC01000071.1	52
OGOJ01000093.1	316_7	OLOC01000071.1	52
OGPG01000068.1	316_7	OLOC01000071.1	52
OGRT01000142.1	316_7	OLOC01000071.1	52
OHBE01000124.1	316_7	OLOC01000071.1	52
OHDP01000044.1	316_7	OLOC01000071.1	52
OHFY01000064.1	316_7	OLOC01000071.1	52
OHLY01000036.1	316_7	OLOC01000071.1	52
OHON01000062.1	316_7	OLOC01000071.1	52
OHPD01000037.1	316_7	OLOC01000071.1	52
OHPT01000015.1	316_7	OLOC01000071.1	52
OHSL01000061.1	316_7	OLOC01000071.1	52
OHUJ01000028.1	316_7	OLOC01000071.1	52
OHVL01000014.1	316_7	OLOC01000071.1	52
OHVZ01000021.1	316_7	OLOC01000071.1	52
OHWZ01000021.1	316_7	OLOC01000071.1	52
OHYB01000032.1	316_7	OLOC01000071.1	52
OHYD01000038.1	316_7	OLOC01000071.1	52
OIAW01000004.1	316_7	OLOC01000071.1	52
OIBL01000021.1	316_7	OLOC01000071.1	52
OICB01000038.1	316_7	OLOC01000071.1	52
OICD01000034.1	316_7	OLOC01000071.1	52
OICH01000018.1	316_7	OLOC01000071.1	52
OICT01000033.1	316_7	OLOC01000071.1	52
OICU01000018.1	316_7	OLOC01000071.1	52
OIDD01000033.1	316_7	OLOC01000071.1	52
OIDI01000002.1	316_7	OLOC01000071.1	52
OJMI01000198.1	316_7	OLOC01000071.1	52
OJPZ01000046.1	316_7	OLOC01000071.1	52
OJRA01000023.1	316_7	OLOC01000071.1	52
OKTG01000067.1	316_7	OLOC01000071.1	52
OKUM01000044.1	316_7	OLOC01000071.1	52
OKUQ01000042.1	316_7	OLOC01000071.1	52
OLGO01000127.1	316_7	OLOC01000071.1	52
OLNG01000123.1	316_7	OLOC01000071.1	52
OLOA01000123.1	316_7	OLOC01000071.1	52
OLOC01000071.1	316_7	OLOC01000071.1	52
OLPK01000154.1	316_7	OLOC01000071.1	52
OLQE01000080.1	316_7	OLOC01000071.1	52
OLRJ01000103.1	316_7	OLOC01000071.1	52
OLRN01000112.1	316_7	OLOC01000071.1	52
OLRW01000085.1	316_7	OLOC01000071.1	52
OLZB01000065.1	316_7	OLOC01000071.1	52
ONZT01000116.1	316_7	OLOC01000071.1	52
ONZZ01000076.1	316_7	OLOC01000071.1	52
OOCQ01000057.1	316_7	OLOC01000071.1	52
OOCV01000090.1	316_7	OLOC01000071.1	52
OCLK01000006.1	316_8	OCLK01000006.1	1
OLSF01000109.1	317_0	OLSF01000109.1	1
OFMN01000122.1	318_1	PPYF01000036.1	10
OGPR01000167.1	318_1	PPYF01000036.1	10
OHWG01000043.1	318_1	PPYF01000036.1	10
OICE01000018.1	318_1	PPYF01000036.1	10
OICU01000028.1	318_1	PPYF01000036.1	10
OLQV01000131.1	318_1	PPYF01000036.1	10
OLRJ01000122.1	318_1	PPYF01000036.1	10
OLVT01000161.1	318_1	PPYF01000036.1	10
OMBL01000040.1	318_1	PPYF01000036.1	10
PPYF01000036.1	318_1	PPYF01000036.1	10
OBAG01000305.1	319_0	OBAG01000305.1	1
OQWE01000002.1	320_0	OQWE01000002.1	1
OIYG01001298.1	321_0	OIYG01001298.1	1
OBJJ01000013.1	324_1	OJMI01000211.1	3
OBKD01000012.1	324_1	OJMI01000211.1	3
OJMI01000211.1	324_1	OJMI01000211.1	3
OKXI01000123.1	325_1	OKXI01000123.1	2
OMNU01000096.1	325_1	OKXI01000123.1	2
OHFM01000127.1	326_1	OHFM01000127.1	4
OHMS01000146.1	326_1	OHFM01000127.1	4
OHSJ01000114.1	326_1	OHFM01000127.1	4
OHTF01000111.1	326_1	OHFM01000127.1	4
OHCE01000262.1	326_2	OJQY01000251.1	2
OJQY01000251.1	326_2	OJQY01000251.1	2
OHCE01000118.1	327_1	OHCE01000118.1	4
OHJG01000113.1	327_1	OHCE01000118.1	4
OHJJ01000119.1	327_1	OHCE01000118.1	4
OHRD01000114.1	327_1	OHCE01000118.1	4
OGXX01000211.1	328_1	OLOO01000195.1	6
OLFX01000457.1	328_1	OLOO01000195.1	6
OLNE01000208.1	328_1	OLOO01000195.1	6
OLOO01000195.1	328_1	OLOO01000195.1	6
OLQH01000235.1	328_1	OLOO01000195.1	6
OLWC01000088.1	328_1	OLOO01000195.1	6
OWIM01000173.1	329_0	OWIM01000173.1	1
OGPE01000310.1	330_1	OJQL01000600.1	8
OHCS01000230.1	330_1	OJQL01000600.1	8
OHKJ01000251.1	330_1	OJQL01000600.1	8
OHMP01000244.1	330_1	OJQL01000600.1	8
OHQM01000209.1	330_1	OJQL01000600.1	8
OHSP01000242.1	330_1	OJQL01000600.1	8
OJQL01000600.1	330_1	OJQL01000600.1	8
OMCT01000362.1	330_1	OJQL01000600.1	8
OHCR01000227.1	330_2	OHCR01000227.1	3
OHNQ01000231.1	330_2	OHCR01000227.1	3
OKTT01000218.1	330_2	OHCR01000227.1	3
OKSH01000619.1	330_3	OKSH01000619.1	1
OGYY01000477.1	331_1	OGYY01000477.1	3
OHNF01000232.1	331_1	OGYY01000477.1	3
OJRG01000225.1	331_1	OGYY01000477.1	3
OFSD01000190.1	332_1	OOCR01000210.1	2
OOCR01000210.1	332_1	OOCR01000210.1	2
OLRP01000138.1	332_2	OLRP01000138.1	1
OGRG01000234.1	333_0	OGRG01000234.1	1
OMFO01000297.1	334_0	OMFO01000297.1	1
OFLZ01000194.1	335_1	OLFZ01000297.1	6
OHSP01000122.1	335_1	OLFZ01000297.1	6
OJQO01000071.1	335_1	OLFZ01000297.1	6
OLFZ01000297.1	335_1	OLFZ01000297.1	6
OLYJ01000050.1	335_1	OLFZ01000297.1	6
OMEK01000042.1	335_1	OLFZ01000297.1	6
OHDA01000114.1	336_1	OIRM01000017.1	18
OIGP01000026.1	336_1	OIRM01000017.1	18
OIHU01000026.1	336_1	OIRM01000017.1	18
OIIJ01000021.1	336_1	OIRM01000017.1	18
OIQV01000024.1	336_1	OIRM01000017.1	18
OIRM01000017.1	336_1	OIRM01000017.1	18
OITP01000018.1	336_1	OIRM01000017.1	18
OIUE01000016.1	336_1	OIRM01000017.1	18
OIVJ01000017.1	336_1	OIRM01000017.1	18
OIVK01000024.1	336_1	OIRM01000017.1	18
OIWV01000203.1	336_1	OIRM01000017.1	18
OKZF01000024.1	336_1	OIRM01000017.1	18
OKZU01000025.1	336_1	OIRM01000017.1	18
OLEZ01000024.1	336_1	OIRM01000017.1	18
OLGI01000257.1	336_1	OIRM01000017.1	18
OLNM01000226.1	336_1	OIRM01000017.1	18
OLZS01000001.1	336_1	OIRM01000017.1	18
PPYE01413027.1	336_1	OIRM01000017.1	18
OHFM01000110.1	336_2	OHFM01000110.1	1
OGOY01000237.1	337_1	OMAC01000147.1	21
OGQZ01000073.1	337_1	OMAC01000147.1	21
OHBY01000081.1	337_1	OMAC01000147.1	21
OHGG01000076.1	337_1	OMAC01000147.1	21
OHKJ01000100.1	337_1	OMAC01000147.1	21
OHKX01000097.1	337_1	OMAC01000147.1	21
OHMP01000091.1	337_1	OMAC01000147.1	21
OHSP01000092.1	337_1	OMAC01000147.1	21
OIIB01000012.1	337_1	OMAC01000147.1	21
OIRN01000008.1	337_1	OMAC01000147.1	21
OISA01000011.1	337_1	OMAC01000147.1	21
OITM01000011.1	337_1	OMAC01000147.1	21
OIVP01000013.1	337_1	OMAC01000147.1	21
OKTS01000090.1	337_1	OMAC01000147.1	21
OLDG01000010.1	337_1	OMAC01000147.1	21
OLIX01000185.1	337_1	OMAC01000147.1	21
OLQJ01000106.1	337_1	OMAC01000147.1	21
OMAC01000147.1	337_1	OMAC01000147.1	21
OMBN01000154.1	337_1	OMAC01000147.1	21
OMER01000150.1	337_1	OMAC01000147.1	21
OMGG01000135.1	337_1	OMAC01000147.1	21
OHBW01000046.1	339_1	OHBW01000046.1	4
OHEG01000046.1	339_1	OHBW01000046.1	4
OHSG01000040.1	339_1	OHBW01000046.1	4
OHSQ01000032.1	339_1	OHBW01000046.1	4
OHQO01000183.1	340_1	OIJW01000051.1	18
OHRS01000162.1	340_1	OIJW01000051.1	18
OIJL01000038.1	340_1	OIJW01000051.1	18
OIJP01000041.1	340_1	OIJW01000051.1	18
OIJW01000051.1	340_1	OIJW01000051.1	18
OIKI01000050.1	340_1	OIJW01000051.1	18
OIKN01000036.1	340_1	OIJW01000051.1	18
OIKO01000045.1	340_1	OIJW01000051.1	18
OIKQ01000049.1	340_1	OIJW01000051.1	18
OILN01000051.1	340_1	OIJW01000051.1	18
OIMP01000037.1	340_1	OIJW01000051.1	18
OIND01000046.1	340_1	OIJW01000051.1	18
OINE01000036.1	340_1	OIJW01000051.1	18
OIOP01000049.1	340_1	OIJW01000051.1	18
OIPA01000043.1	340_1	OIJW01000051.1	18
OIPL01000044.1	340_1	OIJW01000051.1	18
OLAZ01000041.1	340_1	OIJW01000051.1	18
OLBE01000045.1	340_1	OIJW01000051.1	18
OMGI01000144.1	341_0	OMGI01000144.1	1
OODI01000070.1	342_0	OODI01000070.1	1
OJNZ01000175.1	343_1	OJNZ01000175.1	2
OKVK01000176.1	343_1	OJNZ01000175.1	2
OGUO01000173.1	344_0	OGUO01000173.1	1
OODU01000424.1	345_0	OODU01000424.1	1
OHCP01000138.1	346_0	OHCP01000138.1	1
OLFY01001100.1	347_0	OLFY01001100.1	1
OIXQ01000065.1	348_1	OIXQ01000065.1	5
OIYG01000256.1	348_1	OIXQ01000065.1	5
OIYS01000125.1	348_1	OIXQ01000065.1	5
OJAW01000136.1	348_1	OIXQ01000065.1	5
OLHA01000074.1	348_1	OIXQ01000065.1	5
OQVZ01000006.1	348_2	OQVZ01000006.1	1
OIYG01000229.1	349_1	OIYG01000229.1	2
OIYV01000099.1	349_1	OIYG01000229.1	2
OHCI01000125.1	350_1	OHCI01000125.1	2
OHJE01000148.1	350_1	OHCI01000125.1	2
OBIN01000014.1	351_1	OBIN01000014.1	6
OBJJ01000059.1	351_1	OBIN01000014.1	6
OBJW01000028.1	351_1	OBIN01000014.1	6
OBJY01000007.1	351_1	OBIN01000014.1	6
OBKB01000036.1	351_1	OBIN01000014.1	6
OBKD01000062.1	351_1	OBIN01000014.1	6
OLYI01000031.1	352_1	OLYI01000031.1	3
OLZT01000032.1	352_1	OLYI01000031.1	3
OMFF01000036.1	352_1	OLYI01000031.1	3
OLZH01000073.1	353_1	OLZH01000073.1	4
OMAR01000033.1	353_1	OLZH01000073.1	4
OMBD01000028.1	353_1	OLZH01000073.1	4
OMFM01000072.1	353_1	OLZH01000073.1	4
OGQJ01000308.1	353_2	OGQJ01000308.1	1
OHCU01000151.1	354_1	OHFY01000167.1	7
OHFY01000167.1	354_1	OHFY01000167.1	7
OHKY01000148.1	354_1	OHFY01000167.1	7
OHLV01000137.1	354_1	OHFY01000167.1	7
OHLX01000138.1	354_1	OHFY01000167.1	7
OHSL01000172.1	354_1	OHFY01000167.1	7
OHUB01000107.1	354_1	OHFY01000167.1	7
OHJT01000275.1	354_2	OHJT01000275.1	4
OHPW01000231.1	354_2	OHJT01000275.1	4
OHRL01000252.1	354_2	OHJT01000275.1	4
OKUA01000228.1	354_2	OHJT01000275.1	4
OHUR01000127.1	354_3	OHUR01000127.1	4
OHXM01000122.1	354_3	OHUR01000127.1	4
OHYH01000113.1	354_3	OHUR01000127.1	4
OKVA01000081.1	354_3	OHUR01000127.1	4
QWCE01001044.1	355_0	QWCE01001044.1	1
OHDQ01000033.1	356_1	OHDQ01000033.1	4
OHHV01000035.1	356_1	OHDQ01000033.1	4
OHJX01000032.1	356_1	OHDQ01000033.1	4
OHQZ01000029.1	356_1	OHDQ01000033.1	4
OLQG01000157.1	357_0	OLQG01000157.1	1
PPYF01102564.1	358_0	PPYF01102564.1	1
OKWJ01000294.1	359_1	OKWJ01000294.1	1
OOAH01000180.1	359_2	OOAH01000180.1	1
OLFZ01000136.1	360_1	OLFZ01000136.1	2
OLGI01000113.1	360_1	OLFZ01000136.1	2
OHCM01000003.1	361_1	OHCM01000003.1	1
OJPO01000121.1	361_2	OJPO01000121.1	1
OHGI01000197.1	362_1	OHGO01000186.1	5
OHGJ01000200.1	362_1	OHGO01000186.1	5
OHGO01000186.1	362_1	OHGO01000186.1	5
OHOM01000203.1	362_1	OHGO01000186.1	5
OLQJ01000288.1	362_1	OHGO01000186.1	5
OGPH01000700.1	363_1	OGPH01000700.1	1
OGXI01000568.1	363_2	OGXI01000568.1	1
OGWR01001812.1	364_0	OGWR01001812.1	1
OLGM01000006.1	365_1	OLGM01000006.1	2
OLHG01000007.1	365_1	OLGM01000006.1	2
OIXQ01000106.1	366_1	OIXQ01000106.1	2
OIYV01000187.1	366_1	OIXQ01000106.1	2
OLFY01000236.1	367_0	OLFY01000236.1	1
OLHG01000034.1	368_0	OLHG01000034.1	1
OFOK01000466.1	369_1	OLOY01000328.1	3
OLNI01000403.1	369_1	OLOY01000328.1	3
OLOY01000328.1	369_1	OLOY01000328.1	3
OGXJ01000212.1	370_1	OGZN01000022.1	2
OGZN01000022.1	370_1	OGZN01000022.1	2
OOAD01000221.1	370_2	OOAD01000221.1	1
OAWB01000254.1	370_3	OAWB01000254.1	1
OHLQ01000142.1	370_4	OHLQ01000142.1	1
OGOJ01000369.1	370_5	OLPB01000166.1	7
OHKV01000274.1	370_5	OLPB01000166.1	7
OHMY01000270.1	370_5	OLPB01000166.1	7
OHUK01000265.1	370_5	OLPB01000166.1	7
OIWU01000620.1	370_5	OLPB01000166.1	7
OLPB01000166.1	370_5	OLPB01000166.1	7
OLRL01000287.1	370_5	OLPB01000166.1	7
OAUH01000226.1	370_6	OLGF01000549.1	4
OLGF01000549.1	370_6	OLGF01000549.1	4
OLNM01000384.1	370_6	OLGF01000549.1	4
OLPX01000413.1	370_6	OLGF01000549.1	4
OLFS01000339.1	371_1	OLFS01000339.1	1
PPYF01000087.1	371_2	PPYF01000087.1	1
OGPE01000196.1	371_3	OLPX01000364.1	2
OLPX01000364.1	371_3	OLPX01000364.1	2
OLPL01000202.1	371_4	OLPL01000202.1	1
OGYH01000404.1	371_5	OGYH01000404.1	3
OJQI01000145.1	371_5	OGYH01000404.1	3
OJRR01000066.1	371_5	OGYH01000404.1	3
OBAQ01000370.1	371_6	OBAQ01000370.1	1
OLOZ01000381.1	371_7	OLOZ01000381.1	1
OGXX01000467.1	371_8	OHXX01000059.1	4
OHXX01000059.1	371_8	OHXX01000059.1	4
OHYQ01000060.1	371_8	OHXX01000059.1	4
OIAE01000060.1	371_8	OHXX01000059.1	4
OFMU01000203.1	371_9	OFMU01000203.1	1
OHAN01000788.1	371_10	OHAN01000788.1	1
OMAA01000117.1	372_1	OMAA01000117.1	4
OMDC01000114.1	372_1	OMAA01000117.1	4
OMFP01000100.1	372_1	OMAA01000117.1	4
OMGA01000102.1	372_1	OMAA01000117.1	4
OBKS01000397.1	373_1	OHAQ01000192.1	5
OHAQ01000192.1	373_1	OHAQ01000192.1	5
OJNQ01000224.1	373_1	OHAQ01000192.1	5
OJQC01000067.1	373_1	OHAQ01000192.1	5
OKRY01000223.1	373_1	OHAQ01000192.1	5
OGZV01000405.1	373_2	OGZV01000405.1	1
OHAF01000461.1	373_3	OHAF01000461.1	1
OJMI01000536.1	374_1	PPYE01186248.1	2
PPYE01186248.1	374_1	PPYE01186248.1	2
OHFL01000191.1	374_2	OHFL01000191.1	1
OJNJ01000043.1	374_3	OJNJ01000043.1	1
OBKV01000261.1	374_4	OBKV01000261.1	1
OHJQ01000216.1	375_0	OHJQ01000216.1	1
OIZF01000120.1	376_0	OIZF01000120.1	1
OIYG01000284.1	377_0	OIYG01000284.1	1
OIAY01000331.1	378_1	OIAY01000331.1	2
OIBR01000362.1	378_1	OIAY01000331.1	2
OHFH01000359.1	378_2	OHFH01000359.1	4
OHNA01000358.1	378_2	OHFH01000359.1	4
OHNI01000340.1	378_2	OHFH01000359.1	4
OHOJ01000367.1	378_2	OHFH01000359.1	4
OHZL01000400.1	378_3	OHZL01000400.1	2
OIDK01000336.1	378_3	OHZL01000400.1	2
OGWU01000986.1	379_0	OGWU01000986.1	1
OBVO01000052.1	380_1	OHKD01000031.1	7
OGRG01000107.1	380_1	OHKD01000031.1	7
OGRO01000090.1	380_1	OHKD01000031.1	7
OHDZ01000027.1	380_1	OHKD01000031.1	7
OHKD01000031.1	380_1	OHKD01000031.1	7
OKXB01000124.1	380_1	OHKD01000031.1	7
OLQE01000062.1	380_1	OHKD01000031.1	7
OFMT01000022.1	381_1	OGZF01000022.1	7
OFPS01000054.1	381_1	OGZF01000022.1	7
OGZB01000001.1	381_1	OGZF01000022.1	7
OGZF01000022.1	381_1	OGZF01000022.1	7
OHBE01000017.1	381_1	OGZF01000022.1	7
OICR01000007.1	381_1	OGZF01000022.1	7
OLOG01000029.1	381_1	OGZF01000022.1	7
OFMU01000028.1	381_2	OFMU01000028.1	1
OJOU01000011.1	381_3	OJOU01000011.1	1
OHEN01000023.1	381_4	OHEN01000023.1	1
PPYF01266999.1	381_5	PPYF01266999.1	1
OLZO01000021.1	381_6	OLZO01000021.1	2
OMDY01000016.1	381_6	OLZO01000021.1	2
OGOO01000044.1	381_7	OGOO01000044.1	1
OHKV01000027.1	381_8	OHKV01000027.1	3
OHMY01000035.1	381_8	OHKV01000027.1	3
OHQS01000030.1	381_8	OHKV01000027.1	3
OLQV01000028.1	381_9	OLQV01000028.1	1
OIAT01000008.1	381_10	OIAT01000008.1	1
OHXK01000005.1	381_11	OHXK01000005.1	1
OJQQ01000027.1	381_12	OJQQ01000027.1	1
OHYE01000011.1	381_13	OHYE01000011.1	1
OBWI01000023.1	382_1	OICG01000006.1	12
OCHF01000011.1	382_1	OICG01000006.1	12
OCPY01000015.1	382_1	OICG01000006.1	12
OCPZ01000017.1	382_1	OICG01000006.1	12
OFLY01000012.1	382_1	OICG01000006.1	12
OGZF01000025.1	382_1	OICG01000006.1	12
OICG01000006.1	382_1	OICG01000006.1	12
OIZE01000030.1	382_1	OICG01000006.1	12
OJSE01000052.1	382_1	OICG01000006.1	12
OJUG01000072.1	382_1	OICG01000006.1	12
OLJW01000056.1	382_1	OICG01000006.1	12
OMGY01000027.1	382_1	OICG01000006.1	12
OIWQ01000029.1	382_2	OIWQ01000029.1	1
OLOZ01000027.1	382_3	OLOZ01000027.1	1
OJPY01000041.1	383_0	OJPY01000041.1	1
OBAH01000279.1	384_1	OBLG01000365.1	3
OBAI01000414.1	384_1	OBLG01000365.1	3
OBLG01000365.1	384_1	OBLG01000365.1	3
OMCT01000020.1	385_0	OMCT01000020.1	1
OIFO01000134.1	386_1	OIFO01000134.1	2
OKWP01000480.1	386_1	OIFO01000134.1	2
OHTK01000604.1	386_2	OHTK01000604.1	2
OIET01001019.1	386_2	OHTK01000604.1	2
OHGS01000100.1	386_3	OHGS01000100.1	6
OHJC01000119.1	386_3	OHGS01000100.1	6
OHKQ01000093.1	386_3	OHGS01000100.1	6
OJOP01000144.1	386_3	OHGS01000100.1	6
OKSN01000164.1	386_3	OHGS01000100.1	6
OWIL01000135.1	386_3	OHGS01000100.1	6
OKWP01000261.1	386_4	OKWP01000261.1	1
OAUX01000129.1	387_0	OAUX01000129.1	1
OBJJ01000032.1	388_1	OBJJ01000032.1	5
OBKD01000032.1	388_1	OBJJ01000032.1	5
OHBG01000108.1	388_1	OBJJ01000032.1	5
OHGS01000110.1	388_1	OBJJ01000032.1	5
OHKQ01000099.1	388_1	OBJJ01000032.1	5
OLNN01000331.1	389_0	OLNN01000331.1	1
OGOJ01000065.1	390_1	OGYD01000027.1	6
OGWZ01000097.1	390_1	OGYD01000027.1	6
OGYD01000027.1	390_1	OGYD01000027.1	6
OGYN01000044.1	390_1	OGYD01000027.1	6
OGZO01000002.1	390_1	OGYD01000027.1	6
OODJ01000103.1	390_1	OGYD01000027.1	6
OJOH01000017.1	391_1	OMEW01000010.1	3
OMEW01000010.1	391_1	OMEW01000010.1	3
QWBY01000007.1	391_1	OMEW01000010.1	3
OLSP01000004.1	392_1	OMBT01000004.1	3
OMBT01000004.1	392_1	OMBT01000004.1	3
OMEJ01000024.1	392_1	OMBT01000004.1	3
OGOT01000012.1	392_2	OGOT01000012.1	2
OJOE01000015.1	392_2	OGOT01000012.1	2
OIWM01000017.1	393_1	OIWM01000017.1	2
OLFS01000016.1	393_1	OIWM01000017.1	2
OHIN01000009.1	394_1	OHIN01000009.1	5
OHPI01000007.1	394_1	OHIN01000009.1	5
OHTA01000010.1	394_1	OHIN01000009.1	5
OKSX01000010.1	394_1	OHIN01000009.1	5
OMFN01000011.1	394_1	OHIN01000009.1	5
OFMT01000010.1	394_2	OHMA01000001.1	7
OGQH01000028.1	394_2	OHMA01000001.1	7
OHMA01000001.1	394_2	OHMA01000001.1	7
OMAL01000015.1	394_2	OHMA01000001.1	7
OMBP01000015.1	394_2	OHMA01000001.1	7
OMEV01000014.1	394_2	OHMA01000001.1	7
QWCN01000029.1	394_2	OHMA01000001.1	7
OCPV01000032.1	394_3	PPYE01511035.1	3
OGOG01000008.1	394_3	PPYE01511035.1	3
PPYE01511035.1	394_3	PPYE01511035.1	3
OMGK01000003.1	394_4	OMGK01000003.1	1
OHFX01000006.1	395_1	OHFX01000006.1	2
OLNL01000026.1	395_1	OHFX01000006.1	2
OLOE01000004.1	395_2	OLOE01000004.1	1
OAWA01000024.1	396_1	OGTB01000008.1	6
OGTB01000008.1	396_1	OGTB01000008.1	6
OJPU01000022.1	396_1	OGTB01000008.1	6
OKVF01000023.1	396_1	OGTB01000008.1	6
OLRX01000007.1	396_1	OGTB01000008.1	6
OWII01000011.1	396_1	OGTB01000008.1	6
OCHL01000028.1	397_0	OCHL01000028.1	1
OKWR01000042.1	398_0	OKWR01000042.1	1
PPYF01370165.1	399_0	PPYF01370165.1	1
OBKR01000213.1	400_1	OBKR01000213.1	2
OJMI01000253.1	400_1	OBKR01000213.1	2
OBAE01000105.1	401_1	OGRD01000043.1	28
OCHL01000111.1	401_1	OGRD01000043.1	28
OCHV01000094.1	401_1	OGRD01000043.1	28
OGCM01000239.1	401_1	OGRD01000043.1	28
OGOO01000132.1	401_1	OGRD01000043.1	28
OGRD01000043.1	401_1	OGRD01000043.1	28
OGTL01000065.1	401_1	OGRD01000043.1	28
OGXT01000133.1	401_1	OGRD01000043.1	28
OHBE01000089.1	401_1	OGRD01000043.1	28
OIWM01000114.1	401_1	OGRD01000043.1	28
OJOV01000080.1	401_1	OGRD01000043.1	28
OJPT01000035.1	401_1	OGRD01000043.1	28
OJQL01000115.1	401_1	OGRD01000043.1	28
OKSB01000078.1	401_1	OGRD01000043.1	28
OLFT01000163.1	401_1	OGRD01000043.1	28
OLFY01000196.1	401_1	OGRD01000043.1	28
OLND01000117.1	401_1	OGRD01000043.1	28
OLNO01000079.1	401_1	OGRD01000043.1	28
OLNP01000086.1	401_1	OGRD01000043.1	28
OLPO01000070.1	401_1	OGRD01000043.1	28
OLQL01000089.1	401_1	OGRD01000043.1	28
OLRJ01000083.1	401_1	OGRD01000043.1	28
OLRW01000062.1	401_1	OGRD01000043.1	28
OLSO01000074.1	401_1	OGRD01000043.1	28
OLVO01000096.1	401_1	OGRD01000043.1	28
OLVT01000100.1	401_1	OGRD01000043.1	28
OWIQ01000031.1	401_1	OGRD01000043.1	28
OWJC01000051.1	401_1	OGRD01000043.1	28
OATI01000137.1	402_1	OATI01000137.1	3
OLNY01000078.1	402_1	OATI01000137.1	3
OMGY01000095.1	402_1	OATI01000137.1	3
OJQU01000031.1	403_0	OJQU01000031.1	1
OLGY01000065.1	404_0	OLGY01000065.1	1
OLSB01000098.1	405_0	OLSB01000098.1	1
OMAA01000023.1	406_1	OMDC01000016.1	4
OMDC01000016.1	406_1	OMDC01000016.1	4
OMFP01000022.1	406_1	OMDC01000016.1	4
OMGA01000016.1	406_1	OMDC01000016.1	4
OCHF01000043.1	406_2	OLNE01000081.1	7
OCHH01000021.1	406_2	OLNE01000081.1	7
OCPT01000040.1	406_2	OLNE01000081.1	7
OCPY01000053.1	406_2	OLNE01000081.1	7
OCPZ01000052.1	406_2	OLNE01000081.1	7
OFMT01000069.1	406_2	OLNE01000081.1	7
OLNE01000081.1	406_2	OLNE01000081.1	7
OOCH01000086.1	406_3	OOCH01000086.1	1
OBKN01000015.1	406_4	OLNZ01000083.1	8
OHLF01000025.1	406_4	OLNZ01000083.1	8
OIFY01000007.1	406_4	OLNZ01000083.1	8
OKXB01000099.1	406_4	OLNZ01000083.1	8
OLNZ01000083.1	406_4	OLNZ01000083.1	8
OLQG01000039.1	406_4	OLNZ01000083.1	8
OLXC01000001.1	406_4	OLNZ01000083.1	8
OMNQ01000001.1	406_4	OLNZ01000083.1	8
OHFM01000019.1	406_5	OHTF01000018.1	2
OHTF01000018.1	406_5	OHTF01000018.1	2
OHAY01000065.1	406_6	OHAY01000065.1	1
OBCI01000009.1	407_1	OBCI01000009.1	1
OJAR01000005.1	407_2	OJAR01000005.1	1
OMAC01000093.1	408_1	OMAC01000093.1	2
OMBO01000086.1	408_1	OMAC01000093.1	2
OBKN01000017.1	409_1	OBKN01000017.1	1
OFMT01000073.1	409_2	OFMT01000073.1	1
OJAW01000043.1	409_3	OJAW01000043.1	1
OLQC01000215.1	410_1	OLQC01000215.1	1
OLQS01000090.1	410_2	OLQS01000090.1	1
OGYG01000253.1	411_0	OGYG01000253.1	1
OFMV01000048.1	412_1	OLPB01000025.1	5
OLOK01000029.1	412_1	OLPB01000025.1	5
OLPB01000025.1	412_1	OLPB01000025.1	5
OLQG01000044.1	412_1	OLPB01000025.1	5
QWCY01000236.1	412_1	OLPB01000025.1	5
OJQH01000019.1	413_1	OJQH01000019.1	5
OLNE01000087.1	413_1	OJQH01000019.1	5
OLNW01000116.1	413_1	OJQH01000019.1	5
OLPO01000062.1	413_1	OJQH01000019.1	5
OMBQ01000128.1	413_1	OJQH01000019.1	5
OLWB01000066.1	413_2	OLWB01000066.1	1
OLRA01000126.1	413_3	OLRA01000126.1	1
OGXI01000029.1	414_1	OLGF01000091.1	4
OGXX01000055.1	414_1	OLGF01000091.1	4
OLGF01000091.1	414_1	OLGF01000091.1	4
OLOZ01000092.1	414_1	OLGF01000091.1	4
OAUH01000043.1	415_1	OCPX01000081.1	32
OAWM01000083.1	415_1	OCPX01000081.1	32
OBJQ01000077.1	415_1	OCPX01000081.1	32
OBZD01000096.1	415_1	OCPX01000081.1	32
OBZF01000078.1	415_1	OCPX01000081.1	32
OCPX01000081.1	415_1	OCPX01000081.1	32
OGOQ01000098.1	415_1	OCPX01000081.1	32
OGRK01000094.1	415_1	OCPX01000081.1	32
OGTB01000054.1	415_1	OCPX01000081.1	32
OGUN01000050.1	415_1	OCPX01000081.1	32
OGYC01000074.1	415_1	OCPX01000081.1	32
OGZA01000030.1	415_1	OCPX01000081.1	32
OHAD01000101.1	415_1	OCPX01000081.1	32
OHUR01000026.1	415_1	OCPX01000081.1	32
OHXM01000017.1	415_1	OCPX01000081.1	32
OHYH01000026.1	415_1	OCPX01000081.1	32
OICB01000025.1	415_1	OCPX01000081.1	32
OICT01000024.1	415_1	OCPX01000081.1	32
OIDD01000026.1	415_1	OCPX01000081.1	32
OJMH01000169.1	415_1	OCPX01000081.1	32
OJSE01000155.1	415_1	OCPX01000081.1	32
OKRW01000057.1	415_1	OCPX01000081.1	32
OKVA01000013.1	415_1	OCPX01000081.1	32
OLGN01000078.1	415_1	OCPX01000081.1	32
OLOB01000056.1	415_1	OCPX01000081.1	32
OLPS01000138.1	415_1	OCPX01000081.1	32
OLQL01000074.1	415_1	OCPX01000081.1	32
OLRV01000041.1	415_1	OCPX01000081.1	32
OLWC01000027.1	415_1	OCPX01000081.1	32
OLXS01000029.1	415_1	OCPX01000081.1	32
OLXT01000028.1	415_1	OCPX01000081.1	32
QWCY01000259.1	415_1	OCPX01000081.1	32
OIXH01000142.1	416_0	OIXH01000142.1	1
OBJP01000067.1	417_1	OLNQ01000088.1	9
OIEG01000005.1	417_1	OLNQ01000088.1	9
OIZB01000074.1	417_1	OLNQ01000088.1	9
OJOV01000072.1	417_1	OLNQ01000088.1	9
OJQT01000029.1	417_1	OLNQ01000088.1	9
OJRE01000045.1	417_1	OLNQ01000088.1	9
OLGL01000107.1	417_1	OLNQ01000088.1	9
OLNQ01000088.1	417_1	OLNQ01000088.1	9
OLSB01000088.1	417_1	OLNQ01000088.1	9
OBJQ01000079.1	417_2	OFMS01000042.1	5
OFMS01000042.1	417_2	OFMS01000042.1	5
OGYD01000028.1	417_2	OFMS01000042.1	5
OLOX01000059.1	417_2	OFMS01000042.1	5
ONZZ01000054.1	417_2	OFMS01000042.1	5
OHAB01000087.1	417_3	OOCN01000077.1	3
OOCN01000077.1	417_3	OOCN01000077.1	3
QWCH01000269.1	417_3	OOCN01000077.1	3
OAUB01000058.1	417_4	OCHV01000088.1	22
OCHV01000088.1	417_4	OCHV01000088.1	22
OGPX01000023.1	417_4	OCHV01000088.1	22
OHCF01000051.1	417_4	OCHV01000088.1	22
OHCN01000055.1	417_4	OCHV01000088.1	22
OHJU01000015.1	417_4	OCHV01000088.1	22
OHKK01000055.1	417_4	OCHV01000088.1	22
OHPO01000015.1	417_4	OCHV01000088.1	22
OIHW01000011.1	417_4	OCHV01000088.1	22
OIID01000014.1	417_4	OCHV01000088.1	22
OIQP01000011.1	417_4	OCHV01000088.1	22
OIRE01000011.1	417_4	OCHV01000088.1	22
OIRJ01000014.1	417_4	OCHV01000088.1	22
OISE01000013.1	417_4	OCHV01000088.1	22
OITT01000013.1	417_4	OCHV01000088.1	22
OIXA01000142.1	417_4	OCHV01000088.1	22
OKTW01000053.1	417_4	OCHV01000088.1	22
OKYF01000017.1	417_4	OCHV01000088.1	22
OKYI01000013.1	417_4	OCHV01000088.1	22
OKZN01000015.1	417_4	OCHV01000088.1	22
OLDR01000012.1	417_4	OCHV01000088.1	22
OLEF01000014.1	417_4	OCHV01000088.1	22
OJMP01000066.1	417_5	OJMP01000066.1	1
OAVV01000102.1	418_1	OLQG01000043.1	5
OBUX01000069.1	418_1	OLQG01000043.1	5
OGZX01000086.1	418_1	OLQG01000043.1	5
OLQG01000043.1	418_1	OLQG01000043.1	5
OMDJ01000050.1	418_1	OLQG01000043.1	5
OATA01000153.1	419_1	OATA01000153.1	4
OLFT01000150.1	419_1	OATA01000153.1	4
OLFX01000215.1	419_1	OATA01000153.1	4
OLSC01000126.1	419_1	OATA01000153.1	4
OBWJ01000082.1	419_2	OJPW01000082.1	4
OGOI01000071.1	419_2	OJPW01000082.1	4
OJPW01000082.1	419_2	OJPW01000082.1	4
OLQJ01000062.1	419_2	OJPW01000082.1	4
OHAS01000014.1	419_3	OHAS01000014.1	1
OMAL01000049.1	420_1	OMAL01000049.1	4
OMBP01000050.1	420_1	OMAL01000049.1	4
OMCU01000064.1	420_1	OMAL01000049.1	4
OMEV01000060.1	420_1	OMAL01000049.1	4
OGWT01000016.1	421_1	OGWT01000016.1	15
OHAU01000141.1	421_1	OGWT01000016.1	15
OJRV01000117.1	421_1	OGWT01000016.1	15
OJRW01000064.1	421_1	OGWT01000016.1	15
OJRX01000111.1	421_1	OGWT01000016.1	15
OJSC01000122.1	421_1	OGWT01000016.1	15
OJSE01000139.1	421_1	OGWT01000016.1	15
OJSM01000078.1	421_1	OGWT01000016.1	15
OJSN01000076.1	421_1	OGWT01000016.1	15
OJSO01000083.1	421_1	OGWT01000016.1	15
OJSP01000145.1	421_1	OGWT01000016.1	15
OJSQ01000145.1	421_1	OGWT01000016.1	15
OJUG01000180.1	421_1	OGWT01000016.1	15
OLIY01000073.1	421_1	OGWT01000016.1	15
QZMG01000062.1	421_1	OGWT01000016.1	15
OGOM01000068.1	421_2	OGOM01000068.1	1
OJMP01000058.1	421_3	OJMP01000058.1	1
OLOZ01000093.1	422_1	OODL01000120.1	2
OODL01000120.1	422_1	OODL01000120.1	2
OFSD01000058.1	422_2	OOBV01000062.1	5
OGOH01000022.1	422_2	OOBV01000062.1	5
OLQU01000060.1	422_2	OOBV01000062.1	5
OMBK01000035.1	422_2	OOBV01000062.1	5
OOBV01000062.1	422_2	OOBV01000062.1	5
OBYQ01000140.1	422_3	OBYQ01000140.1	1
OLGJ01000032.1	422_4	OLGJ01000032.1	1
OCLC01000020.1	422_5	OJQA01000021.1	7
OEIM01000003.1	422_5	OJQA01000021.1	7
OGYF01000089.1	422_5	OJQA01000021.1	7
OIWL01000154.1	422_5	OJQA01000021.1	7
OJQA01000021.1	422_5	OJQA01000021.1	7
OKRV01000012.1	422_5	OJQA01000021.1	7
OLZJ01000019.1	422_5	OJQA01000021.1	7
OJAG01000039.1	422_6	OJAG01000039.1	1
OFRY01000044.1	422_7	OLNW01000110.1	11
OIJJ01000006.1	422_7	OLNW01000110.1	11
OIKC01000003.1	422_7	OLNW01000110.1	11
OIML01000006.1	422_7	OLNW01000110.1	11
OIMM01000004.1	422_7	OLNW01000110.1	11
OINI01000005.1	422_7	OLNW01000110.1	11
OINS01000004.1	422_7	OLNW01000110.1	11
OIOX01000005.1	422_7	OLNW01000110.1	11
OIXJ01000001.1	422_7	OLNW01000110.1	11
OLAL01000004.1	422_7	OLNW01000110.1	11
OLNW01000110.1	422_7	OLNW01000110.1	11
OMGI01000036.1	422_8	OMGI01000036.1	1
OJQC01000022.1	423_1	OLWW01000036.1	5
OJRQ01000077.1	423_1	OLWW01000036.1	5
OLWD01000041.1	423_1	OLWW01000036.1	5
OLWQ01000028.1	423_1	OLWW01000036.1	5
OLWW01000036.1	423_1	OLWW01000036.1	5
OLNI01000077.1	423_2	OLNI01000077.1	1
OBWV01000111.1	424_1	OLYB01000074.1	31
OGWR01000033.1	424_1	OLYB01000074.1	31
OGXF01000053.1	424_1	OLYB01000074.1	31
OGYG01000098.1	424_1	OLYB01000074.1	31
OGZD01000102.1	424_1	OLYB01000074.1	31
OIIS01000010.1	424_1	OLYB01000074.1	31
OIJZ01000005.1	424_1	OLYB01000074.1	31
OIKP01000007.1	424_1	OLYB01000074.1	31
OILF01000001.1	424_1	OLYB01000074.1	31
OILW01000004.1	424_1	OLYB01000074.1	31
OIMD01000006.1	424_1	OLYB01000074.1	31
OIMW01000001.1	424_1	OLYB01000074.1	31
OIOB01000003.1	424_1	OLYB01000074.1	31
OIOD01000003.1	424_1	OLYB01000074.1	31
OIOK01000005.1	424_1	OLYB01000074.1	31
OIOT01000010.1	424_1	OLYB01000074.1	31
OIOW01000003.1	424_1	OLYB01000074.1	31
OIPC01000005.1	424_1	OLYB01000074.1	31
OIRC01000027.1	424_1	OLYB01000074.1	31
OKTF01000036.1	424_1	OLYB01000074.1	31
OLAY01000001.1	424_1	OLYB01000074.1	31
OLBF01000001.1	424_1	OLYB01000074.1	31
OLBT01000003.1	424_1	OLYB01000074.1	31
OLCX01000005.1	424_1	OLYB01000074.1	31
OLQO01000079.1	424_1	OLYB01000074.1	31
OLRO01000069.1	424_1	OLYB01000074.1	31
OLSC01000138.1	424_1	OLYB01000074.1	31
OLYB01000074.1	424_1	OLYB01000074.1	31
OLZQ01000035.1	424_1	OLYB01000074.1	31
OMFR01000034.1	424_1	OLYB01000074.1	31
OOAG01000060.1	424_1	OLYB01000074.1	31
OLQJ01000056.1	425_1	OLQJ01000056.1	2
PPYF01208384.1	425_1	OLQJ01000056.1	2
OHGL01000049.1	425_2	OWIL01000029.1	7
OHLL01000049.1	425_2	OWIL01000029.1	7
OHTT01000047.1	425_2	OWIL01000029.1	7
OLNY01000079.1	425_2	OWIL01000029.1	7
OLVU01000042.1	425_2	OWIL01000029.1	7
OMGY01000082.1	425_2	OWIL01000029.1	7
OWIL01000029.1	425_2	OWIL01000029.1	7
OGON01000039.1	425_3	OGON01000039.1	1
OGPM01000076.1	425_4	OGPM01000076.1	1
OLNW01000127.1	426_0	OLNW01000127.1	1
OGYM01000002.1	427_1	OGYM01000002.1	2
OLRF01000054.1	427_1	OGYM01000002.1	2
OLVX01000015.1	427_2	OLVX01000015.1	1
OBHU01000008.1	428_1	OBHU01000008.1	2
OJMP01000008.1	428_1	OBHU01000008.1	2
OGOC01000003.1	428_2	OIJI01000001.1	20
OHAY01000006.1	428_2	OIJI01000001.1	20
OIJI01000001.1	428_2	OIJI01000001.1	20
OIKE01000002.1	428_2	OIJI01000001.1	20
OIML01000001.1	428_2	OIJI01000001.1	20
OIMM01000002.1	428_2	OIJI01000001.1	20
OINI01000001.1	428_2	OIJI01000001.1	20
OINJ01000001.1	428_2	OIJI01000001.1	20
OINS01000001.1	428_2	OIJI01000001.1	20
OIOX01000001.1	428_2	OIJI01000001.1	20
OIPU01000001.1	428_2	OIJI01000001.1	20
OIXA01000019.1	428_2	OIJI01000001.1	20
OIXH01000029.1	428_2	OIJI01000001.1	20
OJPI01000006.1	428_2	OIJI01000001.1	20
OKSC01000019.1	428_2	OIJI01000001.1	20
OLAR01000001.1	428_2	OIJI01000001.1	20
OLBP01000001.1	428_2	OIJI01000001.1	20
OLND01000017.1	428_2	OIJI01000001.1	20
OLOX01000006.1	428_2	OIJI01000001.1	20
OLSE01000042.1	428_2	OIJI01000001.1	20
OHFV01000001.1	429_1	OHFV01000001.1	1
QRFC01000022.1	429_2	QRFC01000022.1	1
OLXR01000011.1	429_3	OLXR01000011.1	1
OGPL01000016.1	430_1	OLWB01000021.1	8
OJPG01000010.1	430_1	OLWB01000021.1	8
OLFV01000031.1	430_1	OLWB01000021.1	8
OLWB01000021.1	430_1	OLWB01000021.1	8
OLZQ01000009.1	430_1	OLWB01000021.1	8
OLZR01000008.1	430_1	OLWB01000021.1	8
OMBK01000012.1	430_1	OLWB01000021.1	8
OMFR01000011.1	430_1	OLWB01000021.1	8
OIWM01000893.1	431_0	OIWM01000893.1	1
OODJ01000526.1	432_0	OODJ01000526.1	1
OHIX01000028.1	433_1	OHIX01000028.1	3
OHLF01000031.1	433_1	OHIX01000028.1	3
OHSE01000026.1	433_1	OHIX01000028.1	3
OGCN01000286.1	434_1	OGQG01000082.1	8
OGQG01000082.1	434_1	OGQG01000082.1	8
OHAR01000003.1	434_1	OGQG01000082.1	8
OHBI01000037.1	434_1	OGQG01000082.1	8
OHBR01000043.1	434_1	OGQG01000082.1	8
OHFY01000055.1	434_1	OGQG01000082.1	8
OHSL01000056.1	434_1	OGQG01000082.1	8
OKTG01000061.1	434_1	OGQG01000082.1	8
OGZD01000349.1	435_0	OGZD01000349.1	1
OMBN01000200.1	437_1	OMBN01000200.1	1
PPYE01157942.1	437_2	PPYE01157942.1	1
OHAT01000525.1	438_0	OHAT01000525.1	1
OHAU01000124.1	439_1	OODF01000052.1	2
OODF01000052.1	439_1	OODF01000052.1	2
OGPE01000028.1	439_2	OGPE01000028.1	1
OJPB01000023.1	439_3	OJPB01000023.1	1
OIDC01000172.1	439_4	OIDC01000172.1	1
OLSM01000068.1	440_0	OLSM01000068.1	1
OHMN01000259.1	441_0	OHMN01000259.1	1
OGWQ01000048.1	442_1	OGWQ01000048.1	2
OIWL01000204.1	442_1	OGWQ01000048.1	2
OGQO01000162.1	443_1	OGQO01000162.1	1
OLOK01000165.1	443_2	OLOK01000165.1	1
OHAB01000208.1	444_1	OHAB01000208.1	1
OHFN01000142.1	444_2	OHFN01000142.1	1
OOCX01000393.1	445_0	OOCX01000393.1	1
PPYF01102502.1	446_0	PPYF01102502.1	1
OIYG01000113.1	447_0	OIYG01000113.1	1
QWBY01000088.1	448_0	QWBY01000088.1	1
OBKV01000026.1	449_0	OBKV01000026.1	1
OIZS01000038.1	451_0	OIZS01000038.1	1
OLFV01000176.1	452_0	OLFV01000176.1	1
OIYO01000120.1	453_0	OIYO01000120.1	1
OLYV01000018.1	454_1	OLYV01000018.1	3
OMAN01000017.1	454_1	OLYV01000018.1	3
OMFK01000016.1	454_1	OLYV01000018.1	3
OIZA01000067.1	455_1	OIZA01000067.1	3
OJAW01000105.1	455_1	OIZA01000067.1	3
OLGY01000124.1	455_1	OIZA01000067.1	3
OLWH01000051.1	455_2	OLWH01000051.1	2
OLXH01000052.1	455_2	OLWH01000051.1	2
OGQZ01000292.1	457_0	OGQZ01000292.1	1
OJMG01000551.1	458_0	OJMG01000551.1	1
OFMD01000332.1	459_1	OFMD01000332.1	6
OGZE01000274.1	459_1	OFMD01000332.1	6
OHVB01000094.1	459_1	OFMD01000332.1	6
OHWB01000075.1	459_1	OFMD01000332.1	6
OHZS01000096.1	459_1	OFMD01000332.1	6
OKUO01000069.1	459_1	OFMD01000332.1	6
OIZA01000142.1	459_2	OIZA01000142.1	1
QRFC01000448.1	459_3	QRFC01000448.1	1
OIZF01000197.1	460_1	OIZF01000197.1	2
OIZX01000234.1	460_1	OIZF01000197.1	2
OIYV01000181.1	461_1	OIYV01000181.1	1
OIZT01000182.1	461_2	OIZT01000182.1	1
OIZI01000050.1	462_1	OIZI01000050.1	1
OQWI01000033.1	462_2	OQWI01000033.1	1
OIXK01000001.1	463_1	OIXK01000001.1	2
OIZL01000137.1	463_1	OIXK01000001.1	2
OIXM01000001.1	463_2	OIXM01000001.1	1
OBAE01000091.1	464_1	OMFN01000044.1	4
OBAG01000118.1	464_1	OMFN01000044.1	4
OBAM01000118.1	464_1	OMFN01000044.1	4
OMFN01000044.1	464_1	OMFN01000044.1	4
OJNZ01000055.1	465_1	OJOA01000027.1	2
OJOA01000027.1	465_1	OJOA01000027.1	2
OJOM01000034.1	466_1	OJOM01000034.1	2
OJRA01000016.1	466_1	OJOM01000034.1	2
OKTS01000039.1	466_2	OKTS01000039.1	2
OMBQ01000121.1	466_2	OKTS01000039.1	2
OGWR01000031.1	467_1	OGWR01000031.1	1
OGWS01000068.1	467_2	OGWS01000068.1	1
OIXH01000107.1	467_3	OIXH01000107.1	1
OLSE01000140.1	467_4	OLSE01000140.1	1
OLPO01000063.1	468_0	OLPO01000063.1	1
PPYF01195288.1	469_0	PPYF01195288.1	1
OLRZ01000056.1	470_0	OLRZ01000056.1	1
OCLB01000002.1	471_1	OCLB01000002.1	2
OQVN01000003.1	471_1	OCLB01000002.1	2
OHUS01000015.1	471_2	OIEC01000013.1	7
OHXA01000011.1	471_2	OIEC01000013.1	7
OHZZ01000018.1	471_2	OIEC01000013.1	7
OIAM01000024.1	471_2	OIEC01000013.1	7
OIEC01000013.1	471_2	OIEC01000013.1	7
OIWS01000142.1	471_2	OIEC01000013.1	7
OKVP01000002.1	471_2	OIEC01000013.1	7
OIYV01000031.1	472_0	OIYV01000031.1	1
OGQX01000099.1	473_1	OJPA01000036.1	6
OHBM01000040.1	473_1	OJPA01000036.1	6
OIWS01000145.1	473_1	OJPA01000036.1	6
OJPA01000036.1	473_1	OJPA01000036.1	6
OJPC01000037.1	473_1	OJPA01000036.1	6
OLVR01000187.1	473_1	OJPA01000036.1	6
OFMP01000047.1	473_2	OGCO01000213.1	5
OFMQ01000046.1	473_2	OGCO01000213.1	5
OGCO01000213.1	473_2	OGCO01000213.1	5
OIWT01000163.1	473_2	OGCO01000213.1	5
OIXG01000120.1	473_2	OGCO01000213.1	5
OGPM01000085.1	474_1	OGPM01000085.1	1
OQWI01000009.1	474_2	OQWI01000009.1	1
OFRY01000050.1	475_0	OFRY01000050.1	1
OLSD01000074.1	476_0	OLSD01000074.1	1
OCLL01000003.1	480_0	OCLL01000003.1	1
OBHU01000050.1	481_1	OBHU01000050.1	2
OMGY01000077.1	481_1	OBHU01000050.1	2
OIXH01000106.1	482_0	OIXH01000106.1	1
OWJC01000044.1	483_0	OWJC01000044.1	1
OIXQ01000032.1	484_1	OLHG01000031.1	2
OLHG01000031.1	484_1	OLHG01000031.1	2
OLHG01000250.1	486_0	OLHG01000250.1	1
OGOE01000104.1	487_1	OGTL01000046.1	16
OGOY01000088.1	487_1	OGTL01000046.1	16
OGTL01000046.1	487_1	OGTL01000046.1	16
OJRV01000106.1	487_1	OGTL01000046.1	16
OJRX01000102.1	487_1	OGTL01000046.1	16
OJSC01000104.1	487_1	OGTL01000046.1	16
OJSD01000122.1	487_1	OGTL01000046.1	16
OJSE01000127.1	487_1	OGTL01000046.1	16
OJSM01000071.1	487_1	OGTL01000046.1	16
OJSN01000070.1	487_1	OGTL01000046.1	16
OJSO01000073.1	487_1	OGTL01000046.1	16
OJSP01000129.1	487_1	OGTL01000046.1	16
OJSQ01000126.1	487_1	OGTL01000046.1	16
OJUG01000163.1	487_1	OGTL01000046.1	16
OKWR01000129.1	487_1	OGTL01000046.1	16
OLIY01000066.1	487_1	OGTL01000046.1	16
OCPR01000141.1	488_1	OODP01000063.1	8
OGRK01000080.1	488_1	OODP01000063.1	8
OHEE01000053.1	488_1	OODP01000063.1	8
OHHK01000053.1	488_1	OODP01000063.1	8
OJMI01000112.1	488_1	OODP01000063.1	8
OJNI01000020.1	488_1	OODP01000063.1	8
OKTA01000049.1	488_1	OODP01000063.1	8
OODP01000063.1	488_1	OODP01000063.1	8
OGCO01000164.1	489_0	OGCO01000164.1	1
OLWC01000121.1	490_1	OLWC01000121.1	2
OLXR01000111.1	490_1	OLWC01000121.1	2
OHRM01000198.1	491_1	OHRM01000198.1	2
OHTH01000203.1	491_1	OHRM01000198.1	2
OBJP01000075.1	492_1	OBJP01000075.1	3
OFMB01000041.1	492_1	OBJP01000075.1	3
OOAT01000079.1	492_1	OBJP01000075.1	3
OLPO01000071.1	493_1	UMIU01010253.1	2
UMIU01010253.1	493_1	UMIU01010253.1	2
OLGL01000146.1	493_2	OLGL01000146.1	1
OHWI01000045.1	494_1	OHWI01000045.1	2
OHXU01000048.1	494_1	OHWI01000045.1	2
OIYR01000021.1	495_1	OIYR01000021.1	1
OIZP01000035.1	495_2	OIZP01000035.1	1
OJQF01000018.1	496_1	OLOF01000050.1	3
OLOF01000050.1	496_1	OLOF01000050.1	3
OLQR01000043.1	496_1	OLOF01000050.1	3
OATT01000100.1	496_2	OLGJ01000028.1	79
OAVV01000098.1	496_2	OLGJ01000028.1	79
OAWB01000083.1	496_2	OLGJ01000028.1	79
OBAG01000123.1	496_2	OLGJ01000028.1	79
OBCT01000057.1	496_2	OLGJ01000028.1	79
OBCU01000088.1	496_2	OLGJ01000028.1	79
OBCV01000014.1	496_2	OLGJ01000028.1	79
OBLC01000057.1	496_2	OLGJ01000028.1	79
OBVI01000054.1	496_2	OLGJ01000028.1	79
OBXW01000115.1	496_2	OLGJ01000028.1	79
OBXZ01000146.1	496_2	OLGJ01000028.1	79
OCHF01000050.1	496_2	OLGJ01000028.1	79
OCHG01000105.1	496_2	OLGJ01000028.1	79
OCMA01000041.1	496_2	OLGJ01000028.1	79
OCMC01000052.1	496_2	OLGJ01000028.1	79
OCPZ01000057.1	496_2	OLGJ01000028.1	79
OCRP01000110.1	496_2	OLGJ01000028.1	79
OFLY01000041.1	496_2	OLGJ01000028.1	79
OFME01000049.1	496_2	OLGJ01000028.1	79
OFMN01000076.1	496_2	OLGJ01000028.1	79
OFMO01000072.1	496_2	OLGJ01000028.1	79
OFMP01000048.1	496_2	OLGJ01000028.1	79
OFMQ01000047.1	496_2	OLGJ01000028.1	79
OFRY01000048.1	496_2	OLGJ01000028.1	79
OFRZ01000076.1	496_2	OLGJ01000028.1	79
OFSC01000046.1	496_2	OLGJ01000028.1	79
OGPN01000023.1	496_2	OLGJ01000028.1	79
OGPX01000026.1	496_2	OLGJ01000028.1	79
OGPZ01000054.1	496_2	OLGJ01000028.1	79
OGQQ01000082.1	496_2	OLGJ01000028.1	79
OGRG01000096.1	496_2	OLGJ01000028.1	79
OGSS01000127.1	496_2	OLGJ01000028.1	79
OGZA01000036.1	496_2	OLGJ01000028.1	79
OHAF01000067.1	496_2	OLGJ01000028.1	79
OHAT01000070.1	496_2	OLGJ01000028.1	79
OHKT01000036.1	496_2	OLGJ01000028.1	79
OHLM01000037.1	496_2	OLGJ01000028.1	79
OHNO01000022.1	496_2	OLGJ01000028.1	79
OHPM01000044.1	496_2	OLGJ01000028.1	79
OHQM01000028.1	496_2	OLGJ01000028.1	79
OIWV01000054.1	496_2	OLGJ01000028.1	79
OJML01000021.1	496_2	OLGJ01000028.1	79
OJNH01000048.1	496_2	OLGJ01000028.1	79
OJRB01000021.1	496_2	OLGJ01000028.1	79
OJSI01000113.1	496_2	OLGJ01000028.1	79
OJSM01000088.1	496_2	OLGJ01000028.1	79
OJSN01000086.1	496_2	OLGJ01000028.1	79
OKRV01000014.1	496_2	OLGJ01000028.1	79
OKRW01000064.1	496_2	OLGJ01000028.1	79
OKSA01000050.1	496_2	OLGJ01000028.1	79
OKUM01000038.1	496_2	OLGJ01000028.1	79
OKUZ01000024.1	496_2	OLGJ01000028.1	79
OLGJ01000028.1	496_2	OLGJ01000028.1	79
OLGO01000101.1	496_2	OLGJ01000028.1	79
OLIY01000083.1	496_2	OLGJ01000028.1	79
OLOS01000113.1	496_2	OLGJ01000028.1	79
OLRB01000064.1	496_2	OLGJ01000028.1	79
OLRG01000090.1	496_2	OLGJ01000028.1	79
OLRW01000060.1	496_2	OLGJ01000028.1	79
OLSX01000045.1	496_2	OLGJ01000028.1	79
OLTF01000001.1	496_2	OLGJ01000028.1	79
OLWB01000065.1	496_2	OLGJ01000028.1	79
OLWZ01000040.1	496_2	OLGJ01000028.1	79
OLYR01000006.1	496_2	OLGJ01000028.1	79
OLZQ01000040.1	496_2	OLGJ01000028.1	79
OLZR01000039.1	496_2	OLGJ01000028.1	79
OMAP01000009.1	496_2	OLGJ01000028.1	79
OMAV01000008.1	496_2	OLGJ01000028.1	79
OMBK01000033.1	496_2	OLGJ01000028.1	79
OMCC01000013.1	496_2	OLGJ01000028.1	79
OMCD01000026.1	496_2	OLGJ01000028.1	79
OMCR01000009.1	496_2	OLGJ01000028.1	79
OMFA01000001.1	496_2	OLGJ01000028.1	79
OMFR01000042.1	496_2	OLGJ01000028.1	79
OOAW01000092.1	496_2	OLGJ01000028.1	79
OODC01000039.1	496_2	OLGJ01000028.1	79
OODH01000049.1	496_2	OLGJ01000028.1	79
OODN01000068.1	496_2	OLGJ01000028.1	79
OODS01000049.1	496_2	OLGJ01000028.1	79
OHXQ01000012.1	496_3	OHXQ01000012.1	1
OHAU01000179.1	497_1	OHAU01000179.1	2
OIXR01000085.1	497_1	OHAU01000179.1	2
OJNH01000053.1	498_0	OJNH01000053.1	1
OLYB01008462.1	499_0	OLYB01008462.1	1
OBJF01000120.1	500_1	OBJF01000120.1	4
OBLG01000146.1	500_1	OBJF01000120.1	4
OLFZ01000126.1	500_1	OBJF01000120.1	4
OLNV01000049.1	500_1	OBJF01000120.1	4
OGQI01000045.1	501_1	OGQI01000045.1	6
OGRL01000078.1	501_1	OGQI01000045.1	6
OGTL01000073.1	501_1	OGQI01000045.1	6
OJNL01000044.1	501_1	OGQI01000045.1	6
OKSC01000115.1	501_1	OGQI01000045.1	6
OLPH01000160.1	501_1	OGQI01000045.1	6
OCHM01000051.1	502_0	OCHM01000051.1	1
OBAH01000076.1	503_1	OLOZ01000098.1	3
OBAI01000126.1	503_1	OLOZ01000098.1	3
OLOZ01000098.1	503_1	OLOZ01000098.1	3
OGRO01000082.1	503_2	OGRO01000082.1	2
OLXK01000100.1	503_2	OGRO01000082.1	2
OBAR01000155.1	504_1	OIFE01000101.1	11
OBWJ01000088.1	504_1	OIFE01000101.1	11
OGOL01000109.1	504_1	OIFE01000101.1	11
OIFE01000101.1	504_1	OIFE01000101.1	11
OIWL01000160.1	504_1	OIFE01000101.1	11
OJNQ01000029.1	504_1	OIFE01000101.1	11
OLPB01000029.1	504_1	OIFE01000101.1	11
OLSC01000143.1	504_1	OIFE01000101.1	11
OLWC01000038.1	504_1	OIFE01000101.1	11
OLXR01000035.1	504_1	OIFE01000101.1	11
OLXS01000032.1	504_1	OIFE01000101.1	11
CYGL01000011.1	505_1	CYGL01000011.1	2
QZMG01000076.1	505_1	CYGL01000011.1	2
OBHU01000056.1	505_2	OGTB01000055.1	4
OGTB01000055.1	505_2	OGTB01000055.1	4
OJMP01000070.1	505_2	OGTB01000055.1	4
OLOE01000022.1	505_2	OGTB01000055.1	4
OBKI01000059.1	505_3	OBKI01000059.1	2
OLFZ01000108.1	505_3	OBKI01000059.1	2
OCAA01000151.1	505_4	OCAA01000151.1	1
PPYF01218884.1	505_5	PPYF01218884.1	1
QWCE01000387.1	506_0	QWCE01000387.1	1
OJAR01000031.1	507_0	OJAR01000031.1	1
OIYS01000160.1	508_0	OIYS01000160.1	1
OIEO01000065.1	509_1	OIEO01000065.1	3
OKVM01000179.1	509_1	OIEO01000065.1	3
OKVZ01000149.1	509_1	OIEO01000065.1	3
OKWT01000116.1	510_0	OKWT01000116.1	1
OBJJ01000039.1	511_1	OBJJ01000039.1	2
OBKD01000038.1	511_1	OBJJ01000039.1	2
OHUY01000096.1	512_1	OHUY01000096.1	3
OHXZ01000107.1	512_1	OHUY01000096.1	3
OICI01000065.1	512_1	OHUY01000096.1	3
OCPQ01000328.1	512_2	OCPQ01000328.1	2
OGOF01000357.1	512_2	OCPQ01000328.1	2
OKVV01000229.1	513_0	OKVV01000229.1	1
OKWQ01000164.1	514_0	OKWQ01000164.1	1
OKWZ01000138.1	515_0	OKWZ01000138.1	1
OJAW01000346.1	516_0	OJAW01000346.1	1
OLGD01001459.1	517_0	OLGD01001459.1	1
OIZL01000122.1	518_0	OIZL01000122.1	1
OOBS01000080.1	519_0	OOBS01000080.1	1
OHOP01000180.1	521_0	OHOP01000180.1	1
OIYS01000188.1	522_0	OIYS01000188.1	1
OHEB01000137.1	523_1	OIYO01000348.1	5
OHFI01000129.1	523_1	OIYO01000348.1	5
OHKS01000125.1	523_1	OIYO01000348.1	5
OHQP01000139.1	523_1	OIYO01000348.1	5
OIYO01000348.1	523_1	OIYO01000348.1	5
CYGL01000084.1	524_1	CYGL01000084.1	1
OLVX01000345.1	524_2	OLVX01000345.1	1
OLWY01000178.1	524_3	OLWY01000178.1	1
OLPG01000375.1	525_0	OLPG01000375.1	1
OAVH01000424.1	526_1	OAVH01000424.1	2
OLQN01000614.1	526_1	OAVH01000424.1	2
OLQU01000551.1	526_2	OLQU01000551.1	1
OGZF01000593.1	526_3	OGZF01000593.1	1
OGOM01000651.1	527_1	OGOM01000651.1	1
OIWK01000854.1	527_2	OIWK01000854.1	1
OHDW01000031.1	528_1	OHDW01000031.1	4
OHHE01000031.1	528_1	OHDW01000031.1	4
OHNM01000034.1	528_1	OHDW01000031.1	4
OHSB01000034.1	528_1	OHDW01000031.1	4
OLYC01000560.1	529_0	OLYC01000560.1	1
OGXE01000736.1	530_0	OGXE01000736.1	1
OIET01000963.1	531_1	OIET01000963.1	1
ONZS01001047.1	531_2	ONZS01001047.1	1
OLWH01000622.1	532_1	OLWH01000622.1	1
OMED01000673.1	532_2	OMED01000673.1	1
OGWT01001635.1	532_3	OGWT01001635.1	1
OMGH01001222.1	532_4	OMGH01001222.1	1
OGXS01001325.1	532_5	OGXS01001325.1	1
OAWD01000839.1	533_1	OAWD01000839.1	2
OLQE01001107.1	533_1	OAWD01000839.1	2
OMCM01000847.1	534_1	OMCM01000847.1	4
OMDJ01000800.1	534_1	OMCM01000847.1	4
OMDR01000817.1	534_1	OMCM01000847.1	4
OMEQ01000784.1	534_1	OMCM01000847.1	4
OAVC01000608.1	535_1	OAWF01000598.1	2
OAWF01000598.1	535_1	OAWF01000598.1	2
OLNQ01002138.1	535_2	OLNQ01002138.1	1
OBJG01001371.1	537_0	OBJG01001371.1	1
OGPN01000025.1	538_0	OGPN01000025.1	1
OHAF01000663.1	540_1	OODS01000344.1	2
OODS01000344.1	540_1	OODS01000344.1	2
OJPP01000070.1	541_0	OJPP01000070.1	1
OMNT01000907.1	542_0	OMNT01000907.1	1
OKDZ01000113.1	543_1	OKDZ01000113.1	2
OKEJ01000071.1	543_1	OKDZ01000113.1	2
OIEP01000111.1	544_1	OIEP01000111.1	2
OKVQ01000157.1	544_1	OIEP01000111.1	2
OHNK01000727.1	545_0	OHNK01000727.1	1
OHEV01000503.1	547_1	OHEV01000503.1	11
OHGG01000491.1	547_1	OHEV01000503.1	11
OHLI01000515.1	547_1	OHEV01000503.1	11
OHUI01000463.1	547_1	OHEV01000503.1	11
OHWM01000432.1	547_1	OHEV01000503.1	11
OHYB01000421.1	547_1	OHEV01000503.1	11
OHYD01000494.1	547_1	OHEV01000503.1	11
OHYP01000467.1	547_1	OHEV01000503.1	11
OHZD01000385.1	547_1	OHEV01000503.1	11
OKUN01000491.1	547_1	OHEV01000503.1	11
OKUS01000402.1	547_1	OHEV01000503.1	11
OKVH01000519.1	547_2	OOAO01001212.1	2
OOAO01001212.1	547_2	OOAO01001212.1	2
OIGD01000543.1	548_0	OIGD01000543.1	1
OBJJ01000028.1	549_1	OIYW01000279.1	30
OBJW01000010.1	549_1	OIYW01000279.1	30
OBKD01000030.1	549_1	OIYW01000279.1	30
OBZU01000115.1	549_1	OIYW01000279.1	30
OGPS01000288.1	549_1	OIYW01000279.1	30
OGQG01000319.1	549_1	OIYW01000279.1	30
OHGH01000138.1	549_1	OIYW01000279.1	30
OHUI01000170.1	549_1	OIYW01000279.1	30
OHUP01000107.1	549_1	OIYW01000279.1	30
OHWM01000092.1	549_1	OIYW01000279.1	30
OHXI01000112.1	549_1	OIYW01000279.1	30
OHYB01000095.1	549_1	OIYW01000279.1	30
OHYP01000146.1	549_1	OIYW01000279.1	30
OHZB01000021.1	549_1	OIYW01000279.1	30
OHZD01000100.1	549_1	OIYW01000279.1	30
OHZK01000138.1	549_1	OIYW01000279.1	30
OIAL01000153.1	549_1	OIYW01000279.1	30
OIDS01000155.1	549_1	OIYW01000279.1	30
OIYW01000279.1	549_1	OIYW01000279.1	30
OJPA01000123.1	549_1	OIYW01000279.1	30
OJPF01000158.1	549_1	OIYW01000279.1	30
OJRB01000117.1	549_1	OIYW01000279.1	30
OKUN01000164.1	549_1	OIYW01000279.1	30
OKUS01000096.1	549_1	OIYW01000279.1	30
OKUW01000140.1	549_1	OIYW01000279.1	30
OKWG01000097.1	549_1	OIYW01000279.1	30
OLNY01000292.1	549_1	OIYW01000279.1	30
OLPY01000253.1	549_1	OIYW01000279.1	30
OOAO01000387.1	549_1	OIYW01000279.1	30
PPYF01219050.1	549_1	OIYW01000279.1	30
OGRK01000358.1	549_2	OMDY01000131.1	2
OMDY01000131.1	549_2	OMDY01000131.1	2
QRFC01000462.1	549_3	QRFC01000462.1	1
OHFB01000081.1	550_1	OHFB01000081.1	3
OHRE01000094.1	550_1	OHFB01000081.1	3
OHUB01000097.1	550_1	OHFB01000081.1	3
OHAY01000324.1	550_2	OHAY01000324.1	5
OHDD01000128.1	550_2	OHAY01000324.1	5
OHIM01000144.1	550_2	OHAY01000324.1	5
OHKF01000121.1	550_2	OHAY01000324.1	5
OOCP01000540.1	550_2	OHAY01000324.1	5
OHHR01000330.1	551_1	OHHR01000330.1	2
OKSV01000332.1	551_1	OHHR01000330.1	2
OGOW01000512.1	552_1	OGOW01000512.1	1
PPYF01000090.1	552_2	PPYF01000090.1	1
OIZT01000036.1	553_0	OIZT01000036.1	1
OBAG01000210.1	554_1	OGXT01000261.1	8
OGXT01000261.1	554_1	OGXT01000261.1	8
OGZM01000312.1	554_1	OGXT01000261.1	8
OHIK01000092.1	554_1	OGXT01000261.1	8
OJPI01000122.1	554_1	OGXT01000261.1	8
OLGH01000271.1	554_1	OGXT01000261.1	8
OMGU01000233.1	554_1	OGXT01000261.1	8
OOCP01000298.1	554_1	OGXT01000261.1	8
OBJF01000114.1	555_1	OBJF01000114.1	3
OHVK01000030.1	555_1	OBJF01000114.1	3
OKUZ01000025.1	555_1	OBJF01000114.1	3
QWCH01000280.1	555_2	QWCH01000280.1	1
OGXS01000381.1	556_0	OGXS01000381.1	1
OBAD01000001.1	557_0	OBAD01000001.1	1
OGQL01000011.1	558_0	OGQL01000011.1	1
OKSD01000268.1	559_0	OKSD01000268.1	1
OLFX01000811.1	560_0	OLFX01000811.1	1
OOAD01000226.1	561_0	OOAD01000226.1	1
OJQL01000508.1	562_0	OJQL01000508.1	1
OIYQ01000192.1	563_1	OIYQ01000192.1	1
OJAM01000258.1	563_2	OJAM01000258.1	1
OCAA01000333.1	564_1	OHUR01000100.1	12
OCPW01000172.1	564_1	OHUR01000100.1	12
OHUR01000100.1	564_1	OHUR01000100.1	12
OHXM01000100.1	564_1	OHUR01000100.1	12
OHYE01000165.1	564_1	OHUR01000100.1	12
OHYF01000135.1	564_1	OHUR01000100.1	12
OHYH01000098.1	564_1	OHUR01000100.1	12
OHZK01000135.1	564_1	OHUR01000100.1	12
OIAL01000147.1	564_1	OHUR01000100.1	12
OKVA01000063.1	564_1	OHUR01000100.1	12
OKWR01000397.1	564_1	OHUR01000100.1	12
OKXB01000498.1	564_1	OHUR01000100.1	12
OLGJ01000346.1	566_0	OLGJ01000346.1	1
OJVW01000116.1	567_3	OJVW01000116.1	1
OGCO01004939.1	568_1	OGCO01004939.1	1
QWCB01002870.1	568_2	QWCB01002870.1	1
OLOQ01002673.1	571_1	OLOQ01002673.1	1
OLPO01001767.1	571_2	OLPO01001767.1	1
OLOA01003204.1	572_0	OLOA01003204.1	1
OLOS01002130.1	573_0	OLOS01002130.1	1
OLOV01002225.1	574_0	OLOV01002225.1	1
OIWV01002656.1	575_0	OIWV01002656.1	1
OIWT01004010.1	576_0	OIWT01004010.1	1
OLQD01002637.1	577_0	OLQD01002637.1	1
OLOK01002327.1	578_0	OLOK01002327.1	1
OJOQ01000002.1	579_0	OJOQ01000002.1	1
OLHG01000019.1	580_0	OLHG01000019.1	1
OJAW01000184.1	581_0	OJAW01000184.1	1
OLHG01000159.1	582_0	OLHG01000159.1	1
QWCN01001563.1	583_0	QWCN01001563.1	1
OIWK01003212.1	584_1	OIWK01003212.1	1
OMCT01001838.1	584_2	OMCT01001838.1	1
OMEP01000207.1	584_3	OMEP01000207.1	1
OGZK01000707.1	586_1	OGZK01000707.1	1
OLHG01000336.1	586_2	OLHG01000336.1	1
OJAW01000360.1	587_0	OJAW01000360.1	1
OLHG01000106.1	588_0	OLHG01000106.1	1
QWBY01000202.1	589_0	QWBY01000202.1	1
OLGD01001312.1	590_1	OLGD01001312.1	1
OLPF01000572.1	590_2	OLPF01000572.1	1
OLXK01000530.1	590_3	OLXK01000530.1	1
OIXQ01000112.1	591_0	OIXQ01000112.1	1
OBSA01000030.1	595_0	OBSA01000030.1	1
OJAR01000002.1	596_0	OJAR01000002.1	1
OLXB01000268.1	597_1	OLXB01000268.1	1
OOAN01000374.1	597_2	OOAN01000374.1	1
OHOJ01000069.1	598_0	OHOJ01000069.1	1
OGDF01000062.1	599_1	OLSG01000039.1	5
OJQV01000026.1	599_1	OLSG01000039.1	5
OLNR01000028.1	599_1	OLSG01000039.1	5
OLQR01000013.1	599_1	OLSG01000039.1	5
OLSG01000039.1	599_1	OLSG01000039.1	5
OLRT01000017.1	599_2	OLRT01000017.1	1
OIWS01000653.1	601_0	OIWS01000653.1	1
OIYS01000127.1	602_0	OIYS01000127.1	1
OWIM01000084.1	603_1	OWIP01000111.1	2
OWIP01000111.1	603_1	OWIP01000111.1	2
OOBV01000226.1	603_2	OOBV01000226.1	1
OGPB01000093.1	605_1	OGPB01000093.1	1
PPYF01219028.1	605_2	PPYF01219028.1	1
[truncated: 1,739 more rows]
